# Supplementary material for: NMR spectroscopy and DFT calculations of a self-assembled arene ruthenium rectangle obtained from a combination of coordination and hydrogen bonds
Source: Royal Society of Chemistry journal article supplement (doi:10.1039/c5dt04179a), 2015-12-02
Supplement: c5dt04179a1.pdf [file c5dt04179a1.pdf]

## Electronic Supplementary Information (ESI)

### NMR Spectroscopy and DFT Calculations of a Self-Assembled Arene Ruthenium Rectangle Obtained from a Combination of Coordination and Hydrogen Bonds

Divambal Appavoo,<sup>1</sup> Nandhagopal Raja,<sup>1</sup> Robert Deschenaux,<sup>1</sup> Bruno Therrien<sup>1,2\*</sup> and Diego Carnevale<sup>2,3\*</sup>

<sup>1</sup> *Institut de Chimie, Université de Neuchâtel, Avenue de Bellevaux 51, 2000 Neuchâtel, Switzerland*

<sup>2</sup> *Neuchâtel Platform of Analytical Chemistry (NPAC), Institut de Chimie, Université de Neuchâtel, Avenue de Bellevaux 51, 2000 Neuchâtel, Switzerland*

<sup>3</sup> *Institut des sciences et ingénierie chimiques (ISIC), Ecole Polytechnique Fédérale de Lausanne (EPFL), Avenue Forel 2, 1015 Lausanne, Switzerland*

Corresponding authors: Diego Carnevale  
[diego.carnevale@unine.ch](mailto:diego.carnevale@unine.ch)  
Bruno Therrien  
[bruno.therrien@unine.ch](mailto:bruno.therrien@unine.ch)

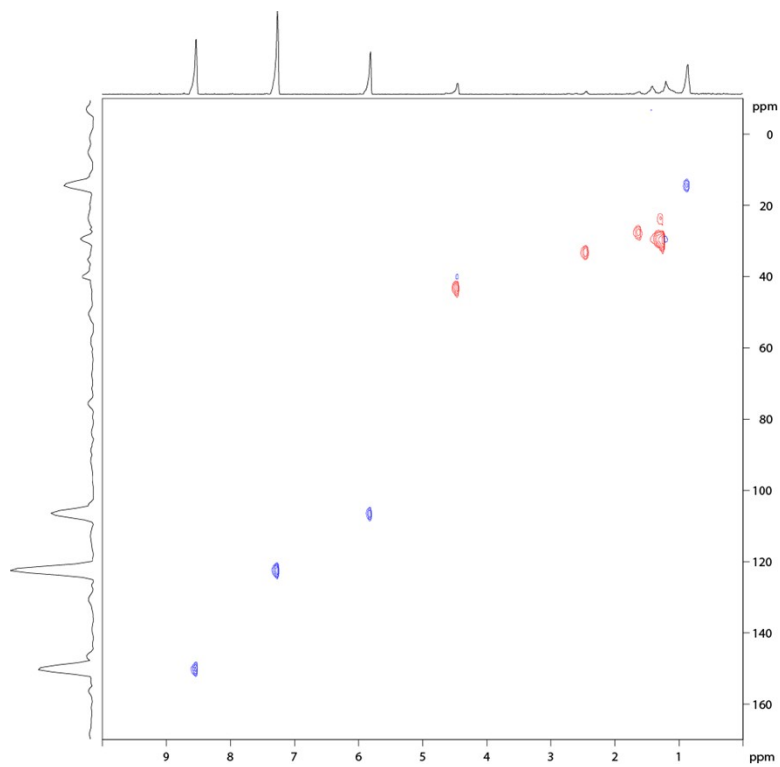

Figure ES1  $^1\text{H}$ - $^{13}\text{C}$  multiplicity-edited HSQC spectrum of UPy in  $\text{CDCl}_3$  at  $B_0 = 9.4$  T and  $T = 298$  K.

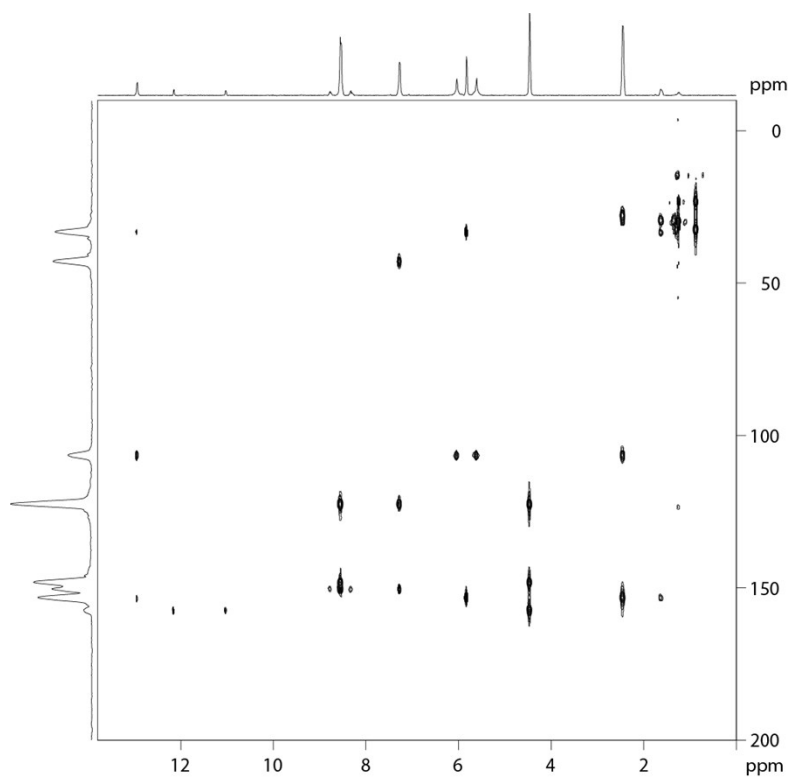

Figure ES2  $^1\text{H}$ - $^{13}\text{C}$  HMBC spectrum of UPy in  $\text{CDCl}_3$  at  $B_0 = 9.4$  T and  $T = 298$  K.

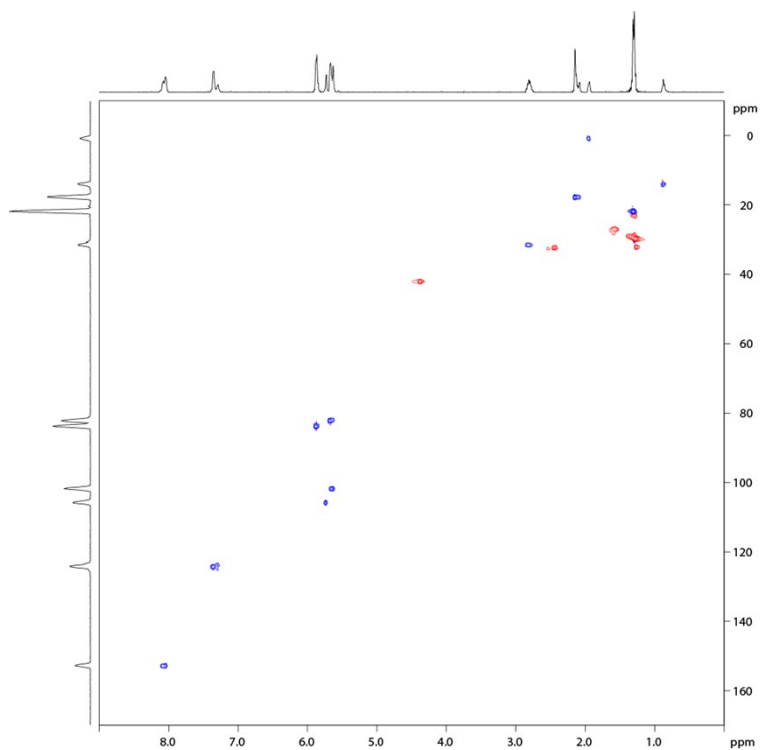

Figure ESI3  $^1\text{H}$ - $^{13}\text{C}$  multiplicity-edited HSQC spectrum of the rectangular self-assembly in  $\text{CDCl}_3$  at  $B_0 = 9.4$  T and  $T = 298$  K.

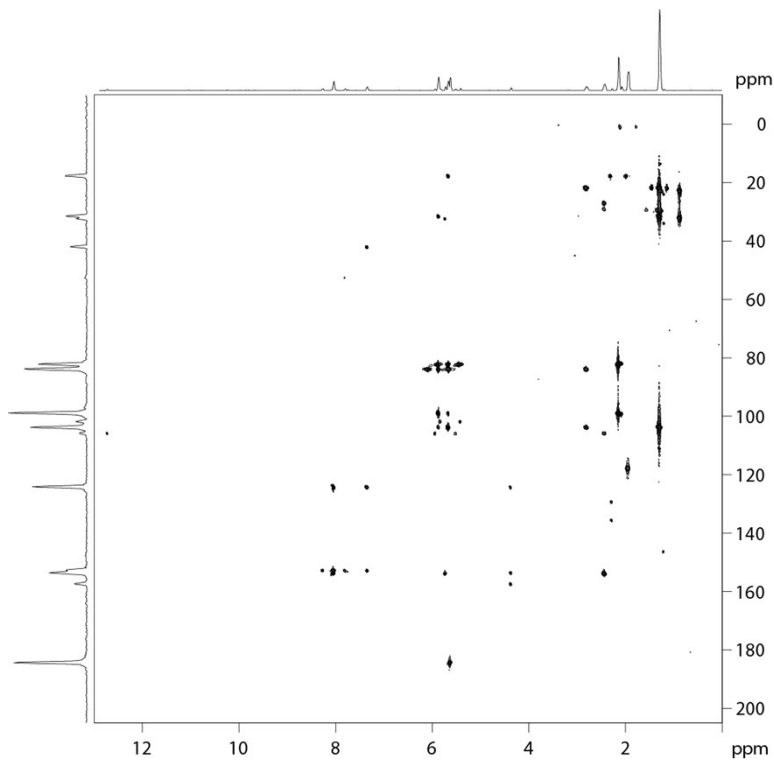

Figure ESI4  $^1\text{H}$ - $^{13}\text{C}$  HMBC spectrum of the rectangular self-assembly in  $\text{CDCl}_3$  at  $B_0 = 9.4$  T and  $T = 298$  K.

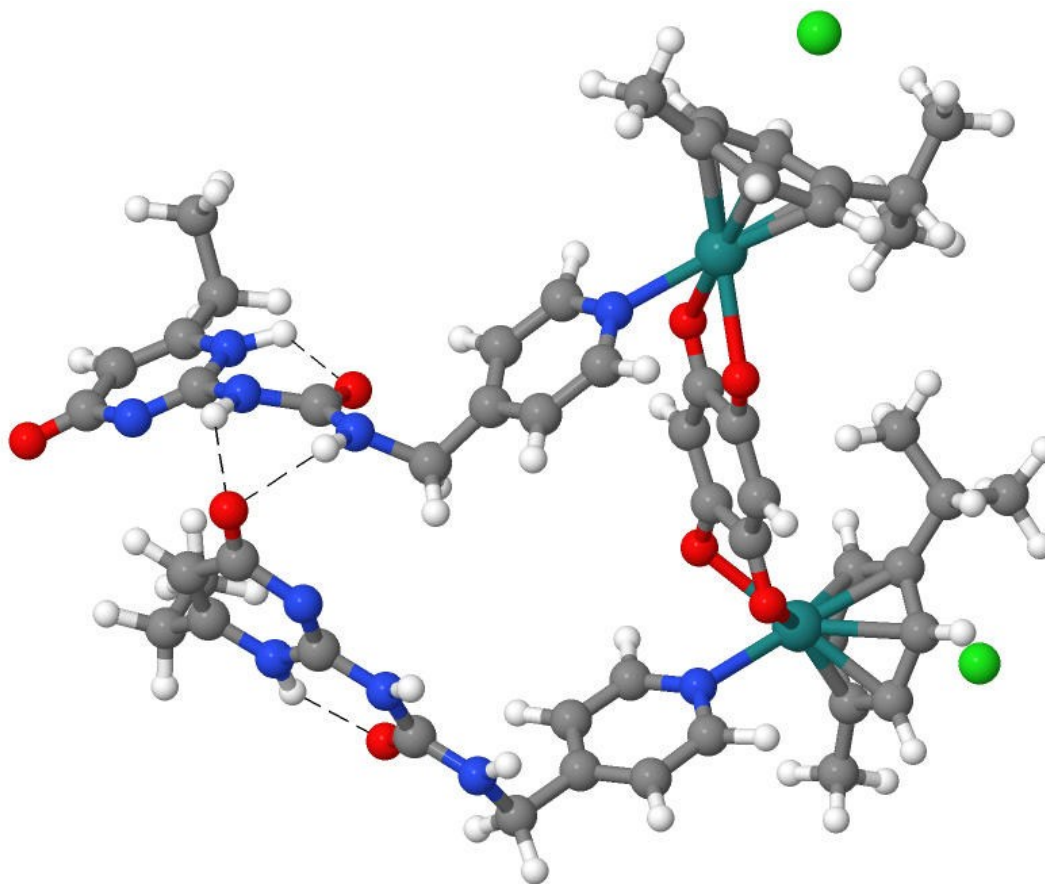

Figure ES15 Half-rectangle structure obtained from a PM7 semiempirical optimization performed on an initial geometry generated by disassembling the H-bonding networks between the two Upy dimers in a full rectangle. The H-bonds are shown as black dashed lines. Both carbonyl groups of the urea moieties appear to retain the *intraUpy* H-bonding with the NH of the pyrimidinones, whereas the only *interUPy* H-bonding is found between the two NH of *one* urea moiety and one carbonyl of the pyrimidinone. The second urea moiety features both NHs not being involved in any H-bond interaction. The heat of formation of this half-rectangle structure, as calculated with MOPAC2012/PM7, is +54.3 kcal/mol higher than half of that of the full rectangle. This is consistent with the energy required to disassemble an isolated Upy dimer into its constituent monomers, i.e., 52.1 kcal/mol, thus indicating that the interactions between the two Upy do not contribute significantly to the stability of this half-rectangle system.

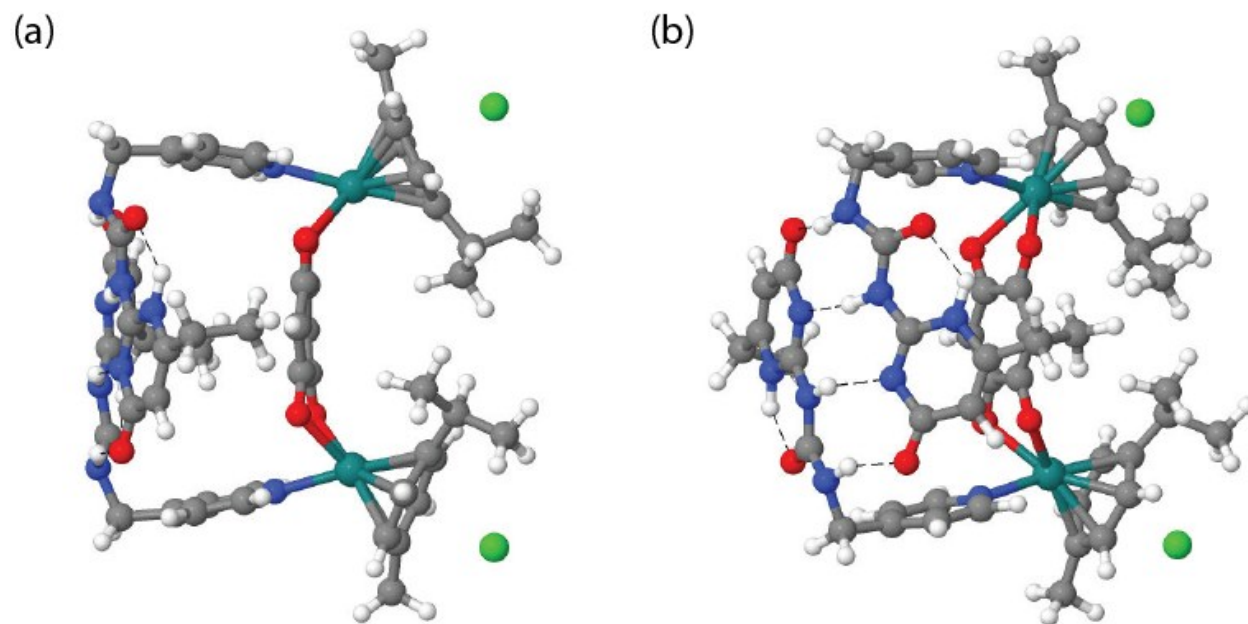

Figure ESI6 (a) Half-rectangle structure obtained from a PM7 semiempirical optimization performed on an initial geometry generated by manipulation of the C(8)-N(9)-C(10)-C(11) dihedral angles of a previously optimized UPy H-bonded dimer so as to favor coordination of the Ru centres of a single arene-Ru clip with minimal distortion of the H-bonding network. (b) Skewed view of the same structure of (a) where one can appreciate the integrity of the H-bonding network. The heat of formation of this half-rectangle structure, as calculated with MOPAC2012/PM7, is +11.02 kcal/mol higher than half of that of the full rectangle.

(a)

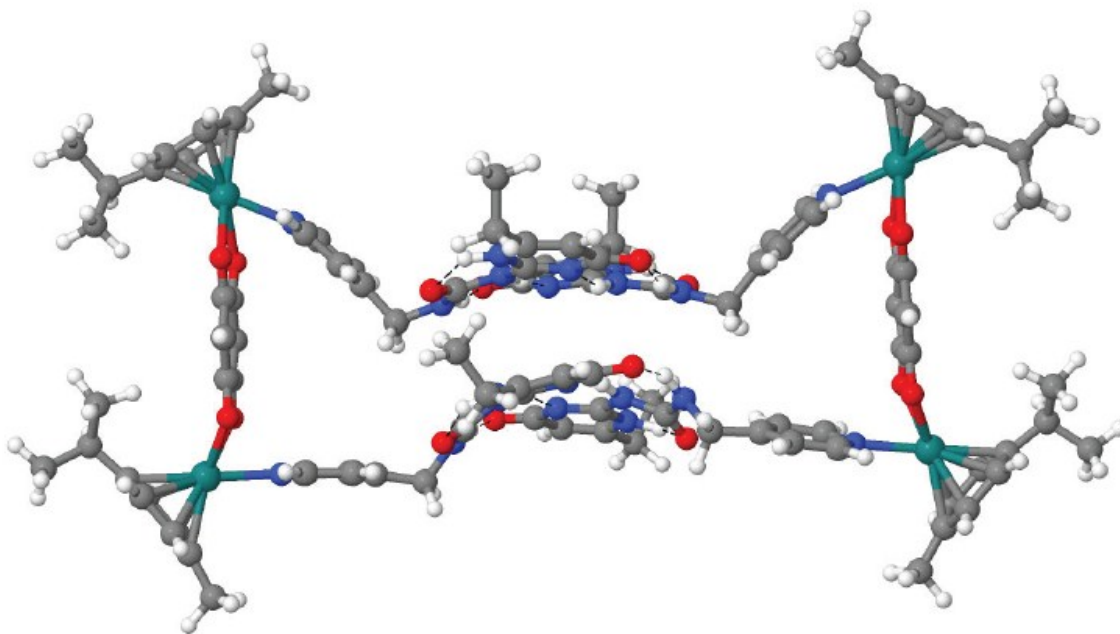

(b)

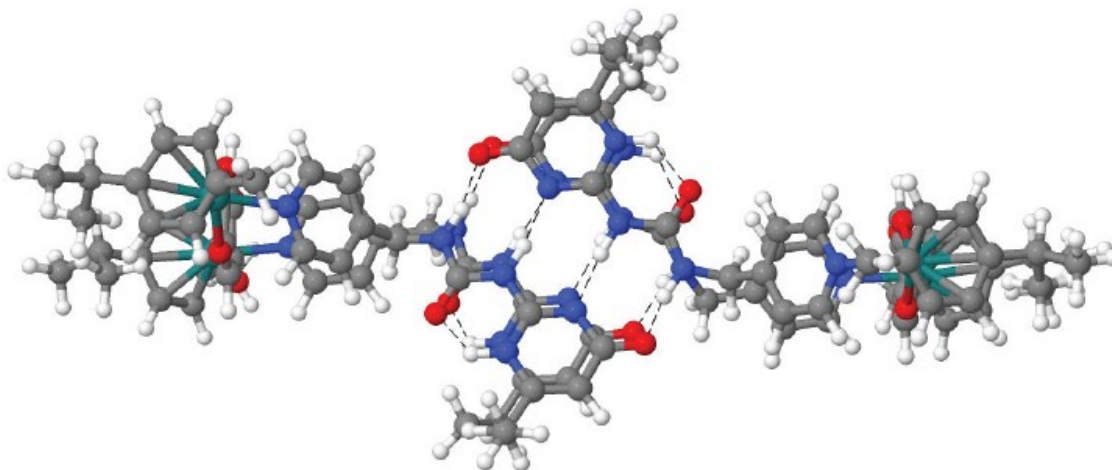

Figure ESI7 (a) Structure of the full rectangle as optimized with DFT methods employing the M06 functional, so as to include for dispersion effects, and the 6-31+G(d,p) basis set. (b) Top view of the structure of (a), where one can appreciate the integrity of the H-bonding network. This structure is very similar to those obtained with the B3LYP method as shown in Fig. 8(b) and (c) of the manuscript, hence the inclusion of dispersion corrections by means of the M06 functional does not result in substantially different interatomic distances from those of the histograms of Fig. 4 and 7.

Table ES11: Distances as measured by ROE experiments and as calculated with DFT methods and used for the histogram of Fig. 4. It is worth noting that the two experimental sets of data are related to the fact that calculations of distances based on ROE enhancements have been performed assuming either a monomeric or a dimeric *reference* distance.

| Irradiated site | NOE response site | Exp $r_{\text{monomer}}$ (Å) | Exp $r_{\text{dimer}}$ (Å) | DFT $r_{\text{monomer}}$ (Å) | DFT $r_{\text{dimer}}$ (Å) |
|-----------------|-------------------|------------------------------|----------------------------|------------------------------|----------------------------|
| H(2)            | H(16)             | 2.78                         | 2.48                       | 3.49                         | 3.14                       |
|                 | H(6)              | 4.44                         | 3.97                       | 4.22                         | 3.77                       |
|                 | H(7)              | 4.90                         | 4.38                       | 5.63                         | 4.17                       |
|                 | H(9)              | 4.24                         | 3.79                       | 7.63                         | 3.86                       |
|                 | H(10)             | 4.96                         | 4.44                       | 7.74                         | 5.05                       |
|                 | H(12)             | 5.27                         | 4.71                       | 8.15                         | 4.69                       |
|                 | H(13)             | 5.44                         | 4.87                       | 10.09                        | 5.21                       |
| H(10)           | H(13)             | 4.22                         | 3.83                       | 4.01                         | 3.57                       |
|                 | H(12)             | 2.73                         | 2.48                       | 2.25                         | 2.03                       |
|                 | H(7)              | 4.93                         | 4.48                       | 3.92                         | 3.46                       |
|                 | H(6)              | 4.31                         | 3.92                       | 4.07                         | 3.48                       |
|                 | H(2)              | 4.83                         | 4.39                       | 7.74                         | 4.91                       |
| H(13)           | H(2)              | 5.39                         | 4.80                       | 10.09                        | 5.21                       |
|                 | H(10)             | 4.22                         | 3.76                       | 4.01                         | 3.57                       |
|                 | H(9)              | 5.29                         | 4.71                       | 4.80                         | 4.15                       |

Table ES12: Differences between distances as measured by ROE experiments and those calculated with DFT methods as shown in the histogram of Fig. 4.

| Irradiated site | NOE response site | $\Delta r_{\text{monomer}}$ (Å) | $\Delta r_{\text{dimer}}$ (Å) |
|-----------------|-------------------|---------------------------------|-------------------------------|
| H(2)            | H(16)             | 0.72                            | 0.66                          |
|                 | H(6)              | 0.22                            | 0.20                          |
|                 | H(7)              | 0.73                            | 0.21                          |
|                 | H(9)              | 3.39                            | 0.07                          |
|                 | H(10)             | 2.77                            | 0.62                          |
|                 | H(12)             | 2.88                            | 0.02                          |
|                 | H(13)             | 4.65                            | 0.34                          |
| H(10)           | H(13)             | 0.21                            | 0.26                          |
|                 | H(12)             | 0.48                            | 0.46                          |
|                 | H(7)              | 1.01                            | 1.03                          |
|                 | H(6)              | 0.24                            | 0.44                          |
|                 | H(2)              | 2.90                            | 0.52                          |
| H(13)           | H(2)              | 4.71                            | 0.41                          |
|                 | H(10)             | 0.21                            | 0.19                          |
|                 | H(9)              | 0.49                            | 0.56                          |

Table ESI3: Experimental and DFT calculated chemical shifts used for the correlations of Fig. 5.

| Site | Experimental                   |                             | DFT Calculated                 |                             |                                |                             |
|------|--------------------------------|-----------------------------|--------------------------------|-----------------------------|--------------------------------|-----------------------------|
|      | $^{13}\text{C}$ $\delta$ (ppm) | $^1\text{H}$ $\delta$ (ppm) | Monomer                        |                             | Dimer                          |                             |
|      |                                |                             | $^{13}\text{C}$ $\delta$ (ppm) | $^1\text{H}$ $\delta$ (ppm) | $^{13}\text{C}$ $\delta$ (ppm) | $^1\text{H}$ $\delta$ (ppm) |
| 1    | 152.8                          | -                           | 152.27                         | -                           | 155.55                         | -                           |
| 2    | 106.1                          | 5.8                         | 111.08                         | 5.35                        | 107.15                         | 5.23                        |
| 3    | 173.2                          | -                           | 168.87                         | -                           | 173.93                         | -                           |
| 5    | 154.5                          | -                           | 151.66                         | -                           | 156.91                         | -                           |
| 6    | -                              | 13                          | -                              | 10.30                       | -                              | 12.79                       |
| 7    | -                              | 12.2                        | -                              | 5.54                        | -                              | 11.60                       |
| 8    | 157                            | -                           | 155.95                         | -                           | 159.81                         | -                           |
| 9    | -                              | 11                          | -                              | 3.47                        | -                              | 10.77                       |
| 10   | 42.5                           | 4.5                         | 42.75                          | 4.15                        | 43.13                          | 4.25                        |
| 11   | 147.7                          | -                           | 150.14                         | -                           | 151.54                         | -                           |
| 12   | 122.1                          | 7.3                         | 122.37                         | 6.82                        | 122.83                         | 6.95                        |
| 13   | 150                            | 8.5                         | 153.90                         | 8.56                        | 153.87                         | 8.32                        |
| 15   | 32.7                           | 2.45                        | 27.48                          | 1.85                        | 27.76                          | 1.87                        |

Table ESI4: Distances as measured by ROE experiments and as calculated with DFT methods and used for the histogram of Fig. 7. The irradiated site is H(13) in all cases. It is worth noting that, although equivalent when reported to their second decimal place, the three experimental sets of data are related to the fact that calculations of distances based on ROE enhancements have been performed assuming three different *reference* distances, according to the considered structure.

| NOE response site | Rectangle (Å)        |                      | Shrunk (Å)           |                      | Counterions (Å)      |                      |
|-------------------|----------------------|----------------------|----------------------|----------------------|----------------------|----------------------|
|                   | $r_{\text{exp}}$ (Å) | $r_{\text{DFT}}$ (Å) | $r_{\text{exp}}$ (Å) | $r_{\text{DFT}}$ (Å) | $r_{\text{exp}}$ (Å) | $r_{\text{DFT}}$ (Å) |
| H(2')             | 2.28                 | 3.02                 | 2.28                 | 2.88                 | 2.28                 | 2.85                 |
| H(5')             | 2.20                 | 2.28                 | 2.20                 | 2.26                 | 2.20                 | 2.26                 |
| H(6')             | 2.61                 | 2.87                 | 2.61                 | 2.94                 | 2.60                 | 2.91                 |

Table ESI5: Differences between distances as measured by ROE experiments and those calculated with DFT methods as shown in the histogram of Fig. 7. The irradiated site is H(13) in all cases.

| NOE response site | $\Delta r$ Rectangle (Å) | $\Delta r$ Shrunk (Å) | $\Delta r$ Counterions (Å) |
|-------------------|--------------------------|-----------------------|----------------------------|
| H(2')             | 0.74                     | 0.60                  | 0.57                       |
| H(5')             | 0.08                     | 0.05                  | 0.05                       |
| H(6')             | 0.27                     | 0.33                  | 0.31                       |



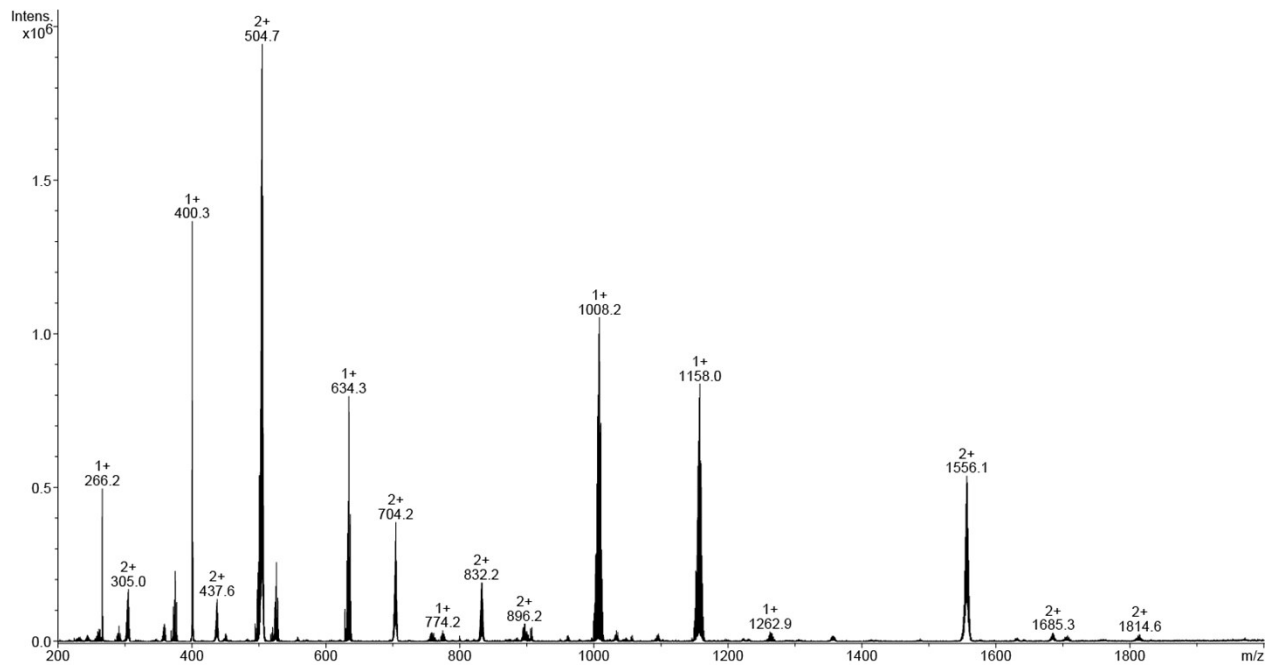

Figure ESI8 ESI-MS spectrum of the rectangular self-assembly in acetonitrile recorded with a Bruker ion trap MS.

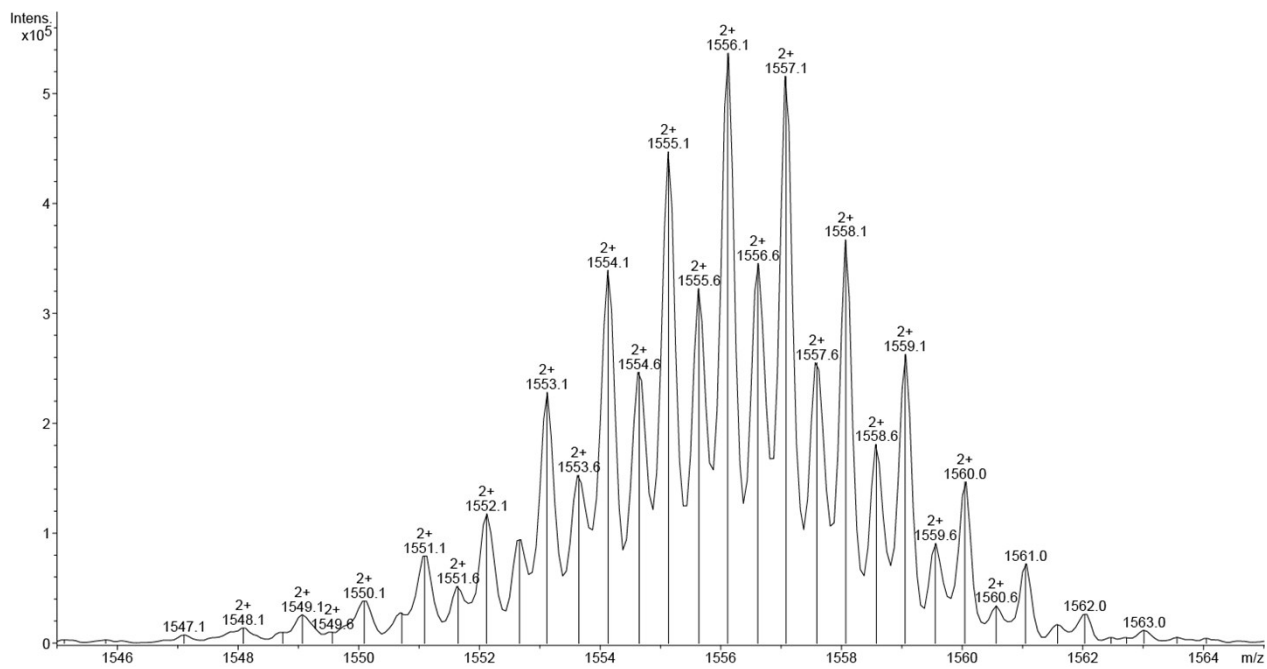

Figure ESI9 Expansion of the MS spectrum of fig. ESI8.

The .xyz file for the structure shown in Figure ES5 is given below.

134

Half-rectangle

```
H 12.63951633 -3.09283184 -2.75210002
H 9.23857318 0.27807550 -2.26762746
C 13.35548926 -0.93451155 -1.18336711
H 9.71136185 6.67813498 -0.96812221
C 12.38156091 -3.70105355 -1.87833360
H 11.52658543 -5.28556717 -3.09837613
H 11.78548969 5.32574558 -1.16382644
C 9.33778735 0.12263559 -1.19688077
O 9.27170962 -2.22644428 -1.33014008
C 13.83897323 -2.18097121 -0.43117474
C 10.07730834 6.13943554 -0.08927368
O 9.41898811 2.41303503 -0.65577182
C 15.21663063 -2.63186361 -0.92761431
C 11.74397605 -4.95774945 -2.07712443
C 12.88846832 -3.34393151 -0.60086841
C 11.26520726 5.36402508 -0.20124459
C 9.39467258 -1.16732017 -0.68004628
H 13.91099146 -1.92534904 0.65760090
C 9.43419945 1.21178019 -0.33367070
Ru 10.64745856 -3.86003196 -0.45945411
C 9.53342529 6.43965532 1.19020802
C 13.47796801 3.29765238 -0.24689042
C 11.64419548 -5.88926138 -1.00763803
Ru 9.71020079 4.14343923 0.86468789
C 14.26390308 5.48900961 0.75095873
C 11.89879004 4.84317988 0.95913640
C 12.64521428 -4.21178024 0.49983195
C 9.53444959 -1.38824760 0.83681597
C 13.30821493 4.30107493 0.90112592
C 9.47918835 0.99207721 1.18392892
C 10.08173866 5.79717788 2.33479722
C 12.01008693 -5.46763274 0.30308740
O 9.58219515 -2.59308338 1.16462438
H 13.10783695 -3.99759426 1.46922216
O 9.42785246 2.05090499 1.83426169
C 9.50990427 -0.30153758 1.70387581
C 11.26732098 5.01826409 2.22200973
H 9.72091913 6.07318099 3.33014524
```

|   |             |             |             |
|---|-------------|-------------|-------------|
| H | 13.53680150 | 3.77371936  | 1.86311440  |
| H | 12.00656612 | -6.19586043 | 1.11937339  |
| H | 9.54527114  | -0.45784033 | 2.77776991  |
| H | 11.78807442 | 4.71285954  | 3.13528424  |
| H | 5.18500481  | 1.83395167  | 2.43943709  |
| H | 7.37631567  | 3.07264425  | 2.78402344  |
| H | 3.23080668  | 4.44167680  | -8.11616764 |
| H | 2.67068919  | 4.88589314  | -6.49823342 |
| C | 5.70557499  | 2.27697719  | 1.59158898  |
| C | 6.90245767  | 2.96704717  | 1.79406091  |
| H | 3.71500317  | 0.69920290  | 0.93365218  |
| H | 1.49863733  | 4.48597063  | -7.75933239 |
| C | 2.48130662  | 4.21756489  | -7.34739354 |
| N | 7.58607249  | 3.51569300  | 0.76273337  |
| C | 5.20866499  | 2.15046535  | 0.29354156  |
| C | 4.02144334  | 1.26579402  | 0.01764139  |
| H | 4.32370016  | 0.49427119  | -0.74164790 |
| O | 3.57247244  | 1.96047365  | -2.62648698 |
| H | 2.90827945  | 2.71835309  | -4.32689258 |
| C | 2.53133506  | 2.74560425  | -6.93604861 |
| H | 3.54990378  | 2.47735968  | -6.58607391 |
| C | 7.05901255  | 3.46947003  | -0.48855300 |
| C | 5.87516605  | 2.78774997  | -0.75627782 |
| N | 2.86157633  | 2.02561538  | -0.45331393 |
| C | 2.68225703  | 2.16153129  | -1.81036426 |
| H | 2.35161969  | 2.09608664  | -7.82104351 |
| N | 1.91937856  | 2.60412554  | -4.56500555 |
| H | 2.08381819  | 2.12674981  | 0.20789306  |
| C | 1.49276431  | 2.48227124  | -5.88713490 |
| H | 7.66720159  | 3.97164943  | -1.26473567 |
| H | 5.48698855  | 2.73143519  | -1.77967263 |
| N | 1.39527268  | 2.58931591  | -2.21750730 |
| C | 0.97620392  | 2.39203848  | -3.55162363 |
| C | 0.20196389  | 2.16513171  | -6.16255401 |
| H | 0.62384017  | 2.57977519  | -1.51786495 |
| H | -0.17546924 | 2.08509222  | -7.17632066 |
| N | -0.27203483 | 2.06002464  | -3.76317623 |
| C | -0.76305592 | 1.91100853  | -5.09111352 |
| O | -1.90556822 | 1.55940818  | -5.25576924 |
| H | 6.63541607  | -5.59624987 | 2.30093390  |
| H | 9.01253747  | -4.87054737 | 1.71457245  |
| H | 0.28920051  | -1.96151419 | -5.36232643 |

|   |             |             |             |
|---|-------------|-------------|-------------|
| H | 1.59421592  | -2.00486539 | -4.16853692 |
| C | 6.87274272  | -5.24678264 | 1.29781687  |
| C | 8.17584392  | -4.86055564 | 0.98714206  |
| H | 4.42061494  | -6.35518612 | 1.40330897  |
| H | 0.73998668  | -0.49003997 | -4.50254978 |
| C | 0.61126988  | -1.57531026 | -4.38619390 |
| N | 8.51405484  | -4.42408497 | -0.25194627 |
| C | 5.89444932  | -5.18001322 | 0.30332367  |
| C | 4.47156103  | -5.56874750 | 0.61003801  |
| H | 3.96979314  | -6.01216790 | -0.29074371 |
| O | 2.68332899  | -4.15812745 | -0.94668994 |
| H | 1.31762178  | -3.06351203 | -1.71251423 |
| C | -0.42044859 | -1.89682452 | -3.30449103 |
| H | -0.62707931 | -2.98601165 | -3.26932704 |
| C | 7.56933835  | -4.36333933 | -1.21918250 |
| C | 6.24443215  | -4.72871189 | -0.96937505 |
| N | 3.72060156  | -4.39789680 | 1.08075152  |
| C | 2.92901576  | -3.72581798 | 0.16694563  |
| H | -1.39768087 | -1.42262566 | -3.57108535 |
| N | 0.97706199  | -2.18445216 | -1.30626045 |
| H | 4.05158881  | -3.96309146 | 1.92872325  |
| C | 0.05437630  | -1.37591356 | -1.98515186 |
| H | 7.91787299  | -3.99631913 | -2.20114816 |
| H | 5.49730915  | -4.65532291 | -1.76290323 |
| N | 2.38715124  | -2.51478144 | 0.63604862  |
| C | 1.47779294  | -1.72347091 | -0.09405107 |
| C | -0.32388128 | -0.18760544 | -1.45015935 |
| H | 2.57705469  | -2.17881205 | 1.58577761  |
| H | -1.05555450 | 0.46630218  | -1.94417449 |
| N | 1.17732433  | -0.55970479 | 0.44498182  |
| C | 0.28708533  | 0.31222035  | -0.22949984 |
| O | 0.15341592  | 1.44175303  | 0.20367119  |
| C | 11.33408130 | -7.31669936 | -1.27878509 |
| H | 10.69451556 | -7.46206790 | -2.15711367 |
| H | 10.87709638 | -7.83255447 | -0.42697975 |
| H | 12.30456742 | -7.83573930 | -1.49297479 |
| H | 15.98027439 | -1.86994449 | -0.76267377 |
| H | 15.20598698 | -2.89415899 | -1.99413173 |
| H | 15.54010663 | -3.56413172 | -0.42790566 |
| H | 13.91138464 | -0.04584493 | -0.86559274 |
| H | 12.28985392 | -0.74812062 | -1.00024116 |
| H | 13.49308711 | -1.03075851 | -2.26601875 |

```
H 12.67793536 2.54703926 -0.23347684
H 14.43847921 2.77731900 -0.17106349
H 13.45256809 3.78883352 -1.22570825
H 14.07563277 6.25423833 1.52909362
H 14.11201503 6.02526734 -0.19400348
H 15.30922993 5.18256066 0.81553076
C 8.53247914 7.52685283 1.34664381
H 7.88276121 7.39429125 2.21972661
H 7.89892458 7.66437627 0.46242895
H 9.09441955 8.48381024 1.49770198
Cl 14.39070423 -5.94832094 -1.32147670
Cl 11.89364973 7.90349572 1.41165737
```

The .xyz file for the structure shown in Figure ESI6 is given below.

134

Half rectangle 2

```
H -10.88350705 5.73934975 2.65493438
H -9.04520809 0.04181010 3.03272698
H -13.46389356 -2.29806533 1.71361850
H -12.21891554 3.65442002 2.51034505
H -12.90965798 -4.34337521 2.98995223
C -11.06192610 5.29325658 1.67201467
H -9.72590492 7.65098474 1.50567854
H -13.73302296 -1.13124099 -0.33072774
C -9.10339615 -0.02288916 1.95127414
C -11.82890657 4.09522829 1.58750997
C -13.00592874 -3.13730083 1.18107054
O -8.83226784 2.29117060 1.59457049
O -9.60289925 -2.32484595 1.90213986
C -12.68050134 -4.31496871 1.92046746
H -13.27319805 1.90794187 1.19010877
C -9.00567195 1.13037316 1.17522165
C -9.35844756 -1.24307684 1.33181959
H -11.20475300 8.10099824 0.62113759
H -15.57877369 -2.88105518 -0.60996992
C -10.29711303 7.44469975 0.59299266
C -13.60694821 -2.01472794 -1.00972985
C -10.76749033 6.03850700 0.49951313
H -12.08599788 -6.72373531 3.02185771
H -14.79305524 3.93724864 1.27881815
H -15.56254728 -1.69197353 -1.93939270
```

|    |              |             |             |
|----|--------------|-------------|-------------|
| C  | -12.95910233 | -3.13795525 | -0.23404167 |
| Ru | -9.99258748  | 3.85086587  | 0.32961247  |
| C  | -12.29087690 | 3.62071434  | 0.33077754  |
| H  | -13.10766349 | -0.65414927 | -2.64006759 |
| C  | -14.99040908 | -2.48963367 | -1.46278611 |
| C  | -13.38098105 | 2.57481147  | 0.29623923  |
| Ru | -10.91961058 | -3.75578424 | 0.64072118  |
| C  | -12.31240145 | -5.50347323 | 1.24527713  |
| H  | -9.69805748  | 7.75938577  | -0.26939416 |
| H  | -13.33679845 | -7.24588626 | 1.86567745  |
| H  | -11.69700553 | -1.43547875 | -1.89392105 |
| C  | -12.74150079 | -1.58787396 | -2.20205007 |
| C  | -12.30898818 | -6.81150122 | 1.95190412  |
| C  | -14.72403990 | 3.30972679  | 0.37550932  |
| H  | -15.56989557 | 2.62000297  | 0.36287656  |
| C  | -9.06736283  | 1.03384763  | -0.36047503 |
| C  | -9.29339394  | -1.35819532 | -0.20180636 |
| C  | -11.08388581 | 5.47029190  | -0.76966871 |
| H  | -14.01276112 | 0.86179338  | -0.88955142 |
| H  | -12.30578224 | 1.30012858  | -1.11579695 |
| H  | -14.92961710 | -3.34054773 | -2.15350844 |
| C  | -11.86063877 | 4.28459982  | -0.84990655 |
| C  | -13.31381245 | 1.70427164  | -0.96316042 |
| C  | -12.46837029 | -4.29760776 | -0.90430843 |
| O  | -9.02023827  | 2.13873568  | -0.93523770 |
| C  | -12.13265741 | -5.46135591 | -0.17333850 |
| O  | -9.38625253  | -2.52938051 | -0.61847242 |
| H  | -11.61330321 | -7.53689267 | 1.51396027  |
| H  | -12.74275573 | -2.33995035 | -2.99758886 |
| H  | -14.84465505 | 4.03029683  | -0.44973236 |
| C  | -9.10931931  | -0.21526540 | -0.97718820 |
| H  | -10.92541536 | 6.06542903  | -1.67373848 |
| H  | -12.52505115 | -4.34520139 | -1.99654418 |
| H  | -12.27999654 | 3.99036097  | -1.81758910 |
| H  | -13.59396129 | 2.26631647  | -1.86127349 |
| H  | -11.94464052 | -6.39683792 | -0.70914399 |
| H  | -9.05713955  | -0.29326738 | -2.05645095 |
| H  | -6.39962196  | 0.27241456  | 5.87899768  |
| H  | -6.24819651  | -1.47496466 | 5.65688390  |
| H  | -6.11894776  | -0.77595879 | 7.27512064  |
| C  | -5.85640523  | -0.61904721 | 6.22120084  |
| H  | -6.52793851  | -5.07512255 | 3.30639504  |

|   |             |             |             |
|---|-------------|-------------|-------------|
| H | -5.77148275 | 4.21916066  | -2.56483299 |
| H | -4.52306451 | -6.12809493 | 2.31115513  |
| H | -8.24457042 | 4.19922343  | -1.90196074 |
| H | -3.88836552 | 1.95465081  | 4.68936538  |
| H | -8.65027540 | -1.50919422 | -4.03412519 |
| C | -4.34559870 | -0.46014968 | 6.04750178  |
| C | -3.85530343 | 1.05355310  | 4.08572880  |
| C | -4.03463443 | -0.18905540 | 4.60751494  |
| C | -3.62876183 | 1.22517646  | 2.65960908  |
| O | -3.46890321 | 2.30060486  | 2.10739105  |
| H | -3.42668040 | 4.24139057  | -1.89184625 |
| N | -3.94973420 | -1.31261092 | 3.78781331  |
| N | -3.62279266 | 0.06709555  | 1.85857057  |
| C | -3.77734981 | -1.12910467 | 2.41408764  |
| H | -4.16236434 | -2.26041057 | 4.14790377  |
| N | -3.75605506 | -2.23758136 | 1.57458910  |
| C | -6.06977555 | 4.22204211  | -1.51434173 |
| H | -3.97093918 | 0.37013189  | 6.68619371  |
| H | -8.18375969 | 0.19959525  | -3.99876227 |
| H | -3.23750633 | 2.19378638  | 0.30348894  |
| C | -7.41782380 | 4.20394561  | -1.16569853 |
| H | -3.72311812 | -2.04401564 | 0.54545669  |
| H | -8.94117603 | -4.30911714 | 3.00882641  |
| H | -3.95457901 | 0.11289546  | -0.07224629 |
| C | -4.09806570 | -3.54678671 | 2.00104596  |
| N | -4.05474479 | -4.50566985 | 1.00998220  |
| C | -6.99413697 | -5.06851538 | 2.31867268  |
| O | -4.33115514 | -3.78627559 | 3.17929205  |
| H | -4.11106646 | -4.20514369 | 0.01215953  |
| N | -3.40716250 | 2.49532502  | -0.67707541 |
| N | -4.28347751 | 0.34494924  | -1.04049168 |
| C | -4.79798887 | -5.74629871 | 1.29782731  |
| H | -3.81591159 | -1.36462377 | 6.41768274  |
| C | -8.14893211 | -0.71489929 | -4.60599379 |
| N | -4.58521399 | -1.94104012 | -1.33842243 |
| O | -4.90798695 | -4.15387676 | -1.60441589 |
| C | -8.31165604 | -4.63786455 | 2.16473388  |
| C | -4.74879758 | -0.71094338 | -1.81252971 |
| C | -3.66499179 | 3.93672978  | -0.84429736 |
| C | -4.11075589 | 1.66346099  | -1.52510615 |
| C | -5.11313970 | 4.17653663  | -0.49740545 |
| C | -5.09489826 | -3.03662203 | -2.05920637 |

```
N -7.81549524 4.14088592 0.12992898
H -8.75138155 -0.53032270 -5.50387689
C -6.27187269 -5.44940651 1.18657572
N -5.39872332 -0.43177279 -3.01641425
C -5.81670154 -2.76187425 -3.29056755
O -4.55954482 1.99955910 -2.61221436
H -4.46950988 -6.51795416 0.56034124
H -5.52226864 0.55048327 -3.30752730
H -6.23013048 -3.61426591 -3.81847698
C -5.96397763 -1.48359545 -3.73182872
C -6.89244912 4.16184764 1.11857902
C -5.52555087 4.18380945 0.83534231
N -8.89274755 -4.56699781 0.94374143
H -2.97037101 4.49545285 -0.17289322
C -6.71657024 -1.10368274 -4.97031947
C -6.89461267 -5.43293211 -0.06229747
H -7.29204008 4.12266994 2.14484088
H -4.79420229 4.15578293 1.65007484
H -6.72230533 -1.95271822 -5.68959280
C -8.20841880 -4.97490561 -0.15196149
H -6.35464887 -5.73348266 -0.96582556
H -6.21690262 -0.27211076 -5.51361877
H -8.76094867 -4.88787801 -1.10466478
Cl -14.98493696 -5.37293962 0.37643463
Cl -13.50149447 6.47412304 0.54599116
```

The .xyz file for the structure shown in Figure ESI7 is given below.

264

Rectangle M06

```
H 12.78775433 -3.96674809 -2.50320433
H 9.82459865 0.24830993 -2.30271761
C 13.75498937 -1.66430828 -1.13129144
H 9.96310781 6.70274749 -1.52473329
C 12.46795284 -4.39427287 -1.54223724
H 11.22003078 -5.90530737 -2.49443622
H 12.12716748 5.48278847 -1.39868945
C 9.89594425 0.18321799 -1.21808849
O 9.87047381 -2.17126950 -1.14941902
C 14.17906314 -2.91089005 -0.34551170
C 10.29056389 6.30308381 -0.55719006
O 9.92794630 2.51289400 -0.84360685
```



C 15.46316527 -3.51346251 -0.92457485  
C 11.59225315 -5.51553895 -1.53752991  
C 13.08287094 -3.95325019 -0.34181142  
C 11.52524783 5.59759783 -0.48622019  
C 9.95158683 -1.05899961 -0.59198056  
H 14.37821009 -2.59713273 0.71517967  
C 9.95540567 1.33394226 -0.43889032  
Ru 10.78496816 -3.98261430 -0.09094706  
C 9.57747260 6.63317689 0.62109657  
C 13.78749656 3.62782991 -0.13154573  
C 11.32314003 -6.21946948 -0.33539444  
Ru 9.95927079 4.35232021 0.54780310  
C 14.44487674 5.92953162 0.69161378  
C 12.07573174 5.23092719 0.76890249  
C 12.73039917 -4.59438994 0.87634237  
C 10.06404325 -1.15605142 0.93712981  
C 13.50036926 4.73754059 0.88383080  
C 9.97348536 1.23300268 1.09229745  
C 10.07626434 6.17520197 1.87069547  
C 11.86421351 -5.71960100 0.87868884  
O 10.13512193 -2.33053944 1.35011674  
H 13.24961647 -4.32003114 1.80570590  
O 9.89601686 2.34385038 1.65132195  
C 10.01321704 -0.00784971 1.71997698  
C 11.31249268 5.47866031 1.94481802  
H 9.56838500 6.46986457 2.79797704  
H 13.65941187 4.31292862 1.91126040  
H 11.71996400 -6.28043489 1.81178474  
H 10.02810265 -0.07512734 2.80703369  
H 11.74892660 5.26828289 2.93109454  
H -12.48076702 -4.34502819 2.61649306  
H -9.82956144 0.40073208 2.32579611  
H -14.00636858 -2.71142115 1.74848315  
C -12.21369038 -4.63751783 1.59139932  
H -10.80408240 -6.15414388 2.26567764  
H -11.88849860 5.64846662 1.75357770  
C -9.93623358 0.33231786 1.24430551  
O -9.98682192 -2.02206827 1.18336225  
C -14.16266970 -3.23760552 0.76851277  
C -10.28670912 6.47600296 0.53121414  
O -9.87462967 2.65854395 0.86309835  
C -15.40374395 -4.13127740 0.87959465

C -11.26426767 -5.67339293 1.39255663  
C -12.96459823 -4.12034516 0.49553303  
C -11.48309534 5.73481721 0.73573209  
C -10.04338904 -0.90926923 0.62510071  
C -14.35391646 -2.17033690 -0.31348390  
C -9.98648093 1.48307135 0.46425831  
Ru -10.69726341 -3.91266539 0.10053802  
C -9.82900977 6.76481248 -0.78173699  
H -13.75379981 4.45571425 0.94251026  
C -11.03348462 -6.20708788 0.09431374  
Ru -10.08896310 4.48683878 -0.51419339  
C -14.68829258 5.75530695 -0.52205605  
C -12.25258065 5.27950960 -0.37080005  
C -12.65111207 -4.57583096 -0.80819089  
C -10.16992200 -1.00833208 -0.90174214  
C -13.63530827 4.70626861 -0.14599618  
C -10.10557393 1.37971842 -1.06163322  
C -10.54548687 6.22891149 -1.88176039  
C -11.69918676 -5.61713590 -1.00650668  
O -10.21175424 -2.18422164 -1.31464646  
H -13.24973588 -4.23592141 -1.66500862  
O -10.07444398 2.48879778 -1.62862977  
C -10.16179158 0.13855032 -1.68720266  
C -11.74243054 5.48707724 -1.67874116  
H -10.24873603 6.48950847 -2.90501487  
C -13.82790260 3.41663561 -0.95063605  
H -11.59021420 -6.04732286 -2.01062925  
H -10.21701039 0.06938224 -2.77240351  
H -12.34931387 5.20463666 -2.55069199  
H 5.88544708 1.54271498 2.37184285  
H 7.75655617 3.25941123 2.51872856  
H 1.77331065 4.88382777 -6.80068203  
H 1.74354781 5.07482266 -5.04235281  
C 6.32455349 1.96481911 1.46205152  
C 7.33861146 2.92006820 1.55521846  
H 5.00755196 -0.30446045 0.88902006  
H 0.22848478 4.92456133 -5.93916058  
C 1.26320454 4.56037521 -5.88214452  
N 7.91123477 3.45794134 0.44922360  
C 5.89445559 1.55645865 0.19870749  
C 4.91441851 0.41896862 0.03712422  
H 5.15019575 -0.15654620 -0.89559507

|   |             |            |             |
|---|-------------|------------|-------------|
| O | 3.59535272  | 1.34826944 | -2.24714402 |
| H | 2.45886522  | 2.27525085 | -3.47365091 |
| C | 1.32713317  | 3.04038615 | -5.73732447 |
| H | 2.38822958  | 2.71102594 | -5.75578267 |
| C | 7.42032006  | 3.13910085 | -0.77679874 |
| C | 6.41236946  | 2.18990715 | -0.93393279 |
| N | 3.53823169  | 0.89634424 | 0.00290214  |
| C | 2.99777092  | 1.31513423 | -1.17545487 |
| H | 0.85579160  | 2.56048122 | -6.62613992 |
| N | 1.43446603  | 2.33615365 | -3.38600610 |
| H | 3.02869763  | 0.95507953 | 0.91442647  |
| C | 0.62106135  | 2.61455458 | -4.48664230 |
| H | 7.90593262  | 3.65186554 | -1.62549662 |
| H | 6.03456138  | 1.93789103 | -1.93202298 |
| N | 1.63621684  | 1.70403512 | -1.07661135 |
| C | 0.83367652  | 1.93912619 | -2.18871992 |
| C | -0.73045354 | 2.52358575 | -4.37373824 |
| H | 1.13426478  | 1.50498344 | -0.16901968 |
| O | 2.54060521  | 1.28946517 | 2.52901416  |
| H | -1.40843319 | 2.74595281 | -5.19418869 |
| N | -0.47646393 | 1.80221390 | -2.05101604 |
| C | -1.34320259 | 2.11673729 | -3.11986822 |
| C | 1.34352057  | 1.42746330 | 2.72320930  |
| N | 0.47439741  | 1.26017597 | 1.62822771  |
| O | -2.54280731 | 2.01846054 | -2.93321004 |
| H | -1.13048903 | 1.24267355 | -0.26672481 |
| H | 1.43084107  | 1.98933098 | 4.81870055  |
| C | 0.74747657  | 1.79488769 | 3.99591781  |
| C | -0.83858988 | 1.38223104 | 1.79013554  |
| N | -1.63250773 | 1.29836985 | 0.65674081  |
| H | -3.04226483 | 1.25732379 | -1.44364117 |
| H | -0.33798910 | 4.37272282 | 5.30475097  |
| C | -0.60149634 | 1.91238740 | 4.11974472  |
| N | -1.42973713 | 1.63775817 | 3.03010055  |
| N | -3.57840471 | 1.01691094 | -0.57835941 |
| C | -3.04200224 | 1.13930384 | 0.66987267  |
| H | -5.04705413 | 0.06645468 | -1.71578044 |
| C | -1.34020914 | 3.92244651 | 5.33928174  |
| H | -1.89355782 | 4.29610842 | 4.47043716  |
| H | -2.45539721 | 1.66617391 | 3.10518090  |
| C | -1.27422556 | 2.39298254 | 5.36828271  |
| H | -5.80990490 | 2.04394093 | 1.44205953  |

|   |             |             |             |
|---|-------------|-------------|-------------|
| H | -0.70440282 | 2.05908194  | 6.26605426  |
| C | -4.96875708 | 0.61596994  | -0.74059740 |
| O | -3.67092507 | 1.10682221  | 1.72159875  |
| H | -1.83777261 | 4.31485777  | 6.23725755  |
| H | -5.25358895 | -0.12147145 | 0.05906570  |
| C | -6.30861481 | 2.34709032  | 0.51182716  |
| H | -2.28898663 | 1.96370608  | 5.49468781  |
| C | -5.93966242 | 1.77113352  | -0.70650724 |
| H | -7.70336959 | 3.75080635  | 1.46631192  |
| C | -7.34116853 | 3.28393128  | 0.53559690  |
| C | -6.55331891 | 2.21905999  | -1.87815600 |
| H | -6.24924251 | 1.83507778  | -2.85564794 |
| N | -8.00567718 | 3.64203487  | -0.59384290 |
| C | -7.58436770 | 3.15551678  | -1.78898705 |
| H | -8.14525331 | 3.51928456  | -2.66839351 |
| H | 6.35186666  | -4.19728289 | 2.75027862  |
| H | 8.84060324  | -4.10513345 | 2.24810715  |
| H | 3.37461837  | -0.45223222 | -6.13924808 |
| H | 3.14518727  | 0.01015757  | -4.44964490 |
| C | 6.70496782  | -4.12987261 | 1.71814972  |
| C | 8.07383988  | -4.07243409 | 1.45290983  |
| H | 4.23216198  | -4.87367103 | 1.92510713  |
| H | 1.96663017  | 0.51110037  | -5.67614532 |
| C | 2.61505709  | -0.31259799 | -5.35715534 |
| N | 8.55309310  | -3.98000632 | 0.18752258  |
| C | 5.80081587  | -4.11916983 | 0.65311479  |
| C | 4.33918225  | -4.41314186 | 0.90847382  |
| H | 4.00590890  | -5.18882921 | 0.16696596  |
| O | 3.52198314  | -3.12605922 | -1.42836837 |
| H | 2.74921136  | -2.04813452 | -2.75244054 |
| C | 1.80478512  | -1.58819533 | -5.13475806 |
| H | 2.47341554  | -2.47843853 | -5.13005564 |
| C | 7.67649264  | -3.90760616 | -0.84501869 |
| C | 6.29657482  | -3.97266903 | -0.64404895 |
| N | 3.44501475  | -3.25756019 | 0.85459418  |
| C | 3.00959860  | -2.81280075 | -0.35923425 |
| H | 1.11813841  | -1.76101874 | -5.99489773 |
| N | 1.77061330  | -1.71819469 | -2.69734255 |
| H | 3.00415215  | -2.94549341 | 1.74580032  |
| C | 1.02942256  | -1.49329351 | -3.85655258 |
| H | 8.13333542  | -3.80231425 | -1.84353942 |
| H | 5.60783533  | -3.92529204 | -1.49809804 |

N 1.87538114 -1.95164650 -0.31570631  
C 1.11659362 -1.71488865 -1.46434532  
C -0.29670006 -1.20817553 -3.76719005  
H 1.35947288 -1.83256491 0.59010555  
O 2.39906310 -2.74433473 3.35051773  
H -0.90979310 -0.99372999 -4.63854134  
N -0.17867811 -1.46535177 -1.33425207  
C -0.96700259 -1.20475526 -2.47590902  
C 1.18492891 -2.75461040 3.46610446  
N 0.41235497 -2.41831608 2.33294728  
O -2.16434125 -1.04408859 -2.31523728  
H -1.09161489 -1.65867009 0.48353072  
H 1.06970203 -3.35382036 5.55275361  
C 0.47168675 -3.14760455 4.66726203  
C -0.90667481 -2.51690899 2.37128052  
N -1.63642226 -2.12963026 1.24591567  
H -3.00090529 -1.42196808 -0.72150889  
H -1.42199591 -1.91000963 6.95002853  
C -0.88029698 -3.28662242 4.64965300  
N -1.60198385 -2.96349513 3.49832176  
N -3.52394328 -2.14449198 -0.18239957  
C -2.91952042 -2.65992492 0.95288689  
H -4.18929816 -2.70497552 -2.08484790  
C -2.23307901 -2.55547033 6.58600626  
H -2.89878043 -1.93920430 5.97178777  
H -2.59850059 -3.20825569 3.41685670  
C -1.68918009 -3.75788425 5.81757689  
H -5.58497340 -2.90195185 1.48077579  
H -1.06143294 -4.38682345 6.49307787  
C -4.30592085 -3.06163884 -1.02286370  
O -3.46649461 -3.44025004 1.71471206  
H -2.80585688 -2.88013925 7.46636347  
H -3.87424051 -4.09805483 -0.99455670  
C -6.25503653 -3.11782803 0.63940106  
H -2.51781382 -4.42760283 5.50137805  
C -5.76786234 -3.17732810 -0.66673093  
H -8.04717218 -3.34068897 1.89513490  
C -7.60899481 -3.36524076 0.88262171  
C -6.67671836 -3.45406626 -1.69810630  
H -6.35094826 -3.49453290 -2.73881852  
N -8.47698165 -3.64944770 -0.11862029  
C -8.01604749 -3.69121591 -1.39471727

H -8.78450474 -3.91718739 -2.15888836  
C 10.66153431 -7.55130317 -0.36356748  
H 10.00820796 -7.68857412 -1.23774572  
H 10.04649460 -7.73881859 0.52972046  
H 11.42098580 -8.35984836 -0.40363155  
H 16.29216808 -2.79336151 -0.87066990  
H 15.35355168 -3.79595214 -1.97785635  
H 15.78391103 -4.40939268 -0.37684297  
H 14.41536801 -0.81773515 -0.90318667  
H 12.72563737 -1.36842406 -0.88547526  
H 13.80230092 -1.82023999 -2.21564892  
H 13.02742801 2.83790158 -0.07840098  
H 14.76404015 3.16601221 0.06175133  
H 13.80737535 3.99374790 -1.16404040  
H 14.21609949 6.74350514 1.39249768  
H 14.39097886 6.34475376 -0.32190852  
H 15.49127724 5.63861016 0.86251423  
C 8.43767954 7.58868241 0.57759696  
H 7.63901669 7.32517266 1.28914175  
H 7.97293885 7.65709795 -0.41806359  
H 8.77843200 8.61127571 0.83735073  
C -8.74002721 7.75393060 -1.00340520  
H -8.15762968 7.54992313 -1.91578580  
H -8.02065096 7.79289360 -0.17063158  
H -9.16162024 8.77391833 -1.11320440  
H -14.67513539 5.99173848 -1.59282289  
H -14.54102222 6.69730760 0.02213741  
H -15.70141640 5.39949642 -0.28081563  
H -13.00150494 2.71410736 -0.77709347  
H -13.88007908 3.60168487 -2.03024648  
H -14.76072337 2.91164746 -0.66883478  
C -10.26695137 -7.47157179 -0.07093021  
H -9.42616175 -7.55470687 0.63510664  
H -9.84883085 -7.59117485 -1.08248836  
H -10.92345257 -8.34896393 0.10579057  
H -15.07977969 -1.41159713 0.01046604  
H -14.73820719 -2.58996753 -1.25060629  
H -13.41245162 -1.65497934 -0.54024053  
H -16.29997210 -3.53783878 1.11219517  
H -15.29846841 -4.88052958 1.67379598  
H -15.60839924 -4.67093247 -0.05328712  
H -9.78687157 6.93077190 1.39525017

The .xyz file for the monomer shown in Figure 9 and used for the calculations of interatomic distances and chemical shifts shown in Fig. 4 and 5, respectively, is given below.

35

Monomer

|   |           |           |           |
|---|-----------|-----------|-----------|
| C | 3.744060  | 0.587230  | 0.549740  |
| N | 2.419860  | 0.447720  | 0.162600  |
| C | 1.972110  | -0.769350 | -0.250650 |
| N | 0.627990  | -0.869640 | -0.630690 |
| N | 2.675570  | -1.848440 | -0.323260 |
| C | 4.033600  | -1.803920 | 0.051420  |
| O | 4.732590  | -2.802270 | -0.003440 |
| C | 4.541560  | -0.502260 | 0.503010  |
| H | 0.396860  | -1.810220 | -0.920550 |
| C | -0.326530 | 0.136860  | -0.653880 |
| O | -0.081020 | 1.293620  | -0.319070 |
| N | -1.559530 | -0.271240 | -1.075140 |
| C | 4.171860  | 1.964460  | 0.975090  |
| C | -2.686110 | 0.644680  | -1.196970 |
| H | -1.704460 | -1.235780 | -1.332210 |
| H | -7.259460 | 0.000930  | -0.418860 |
| C | -6.244170 | -0.030850 | -0.033600 |
| C | -5.170790 | 0.302180  | -0.859160 |
| H | -5.349900 | 0.593610  | -1.888760 |
| C | -3.875930 | 0.252250  | -0.344030 |
| C | -3.728790 | -0.139560 | 0.988300  |
| H | -2.748340 | -0.198520 | 1.446670  |
| C | -4.864610 | -0.454030 | 1.729200  |
| H | -4.771230 | -0.758940 | 2.767600  |
| N | -6.108640 | -0.405350 | 1.240320  |
| H | -2.991930 | 0.719480  | -2.244990 |
| H | -2.314380 | 1.626060  | -0.895070 |
| H | 3.501540  | 2.317490  | 1.768060  |
| C | 4.191350  | 2.985740  | -0.176310 |
| H | 5.166930  | 1.885190  | 1.416810  |
| H | 3.200850  | 3.122240  | -0.618120 |
| H | 4.872240  | 2.664900  | -0.968120 |
| H | 4.526970  | 3.959190  | 0.188730  |
| H | 1.748860  | 1.214000  | 0.170730  |
| H | 5.580420  | -0.442610 | 0.798280  |

The .xyz file for the H-bond dimer shown in Figure 9 and used for the calculations of interatomic distances and chemical shifts shown in Fig. 4 and 5, respectively, is given below.

70

H-Bond dimer

|   |           |           |           |
|---|-----------|-----------|-----------|
| C | 0.756710  | 4.328450  | -0.410410 |
| N | -0.363120 | 3.526870  | -0.355150 |
| C | -0.255170 | 2.171790  | -0.396290 |
| N | -1.409360 | 1.428410  | -0.352210 |
| N | 0.894710  | 1.542350  | -0.477720 |
| C | 2.066970  | 2.282901  | -0.547800 |
| O | 3.159780  | 1.704941  | -0.641140 |
| C | 1.968010  | 3.731461  | -0.506260 |
| H | -1.260690 | 0.407770  | -0.407510 |
| C | -2.715210 | 1.950420  | -0.319380 |
| O | -2.926480 | 3.169759  | -0.266070 |
| N | -3.681450 | 1.015859  | -0.344290 |
| C | 0.522179  | 5.812710  | -0.371560 |
| C | -5.084420 | 1.393389  | -0.429680 |
| H | -3.437559 | 0.019019  | -0.472050 |
| H | -9.155349 | -0.623652 | 0.662520  |
| C | -8.130709 | -0.406822 | 0.950190  |
| C | -7.303709 | 0.310408  | 0.093440  |
| H | -7.682420 | 0.647658  | -0.866820 |
| C | -5.987180 | 0.576559  | 0.474780  |
| C | -5.573329 | 0.093609  | 1.716360  |
| H | -4.559249 | 0.254359  | 2.063310  |
| C | -6.478579 | -0.616481 | 2.502150  |
| H | -6.171879 | -1.003841 | 3.468750  |
| N | -7.739649 | -0.871932 | 2.140300  |
| H | -5.435300 | 1.304589  | -1.462890 |
| H | -5.152900 | 2.450389  | -0.161870 |
| H | -0.067631 | 6.053100  | 0.520680  |
| C | -0.191301 | 6.354080  | -1.623230 |
| H | 1.490149  | 6.303351  | -0.252950 |
| H | -1.183571 | 5.914060  | -1.748530 |
| H | 0.389299  | 6.143250  | -2.524380 |
| H | -0.316441 | 7.436260  | -1.544210 |
| H | -1.326640 | 3.880820  | -0.292590 |
| H | 2.880600  | 4.308971  | -0.550510 |
| H | 0.059762  | -6.046420 | 0.516210  |



```

H  6.165510  0.947592  3.487820
H  4.557071 -0.286559  2.060020
C  6.474740  0.575322  2.514830
H  5.153711 -2.447409 -0.205370
C  5.571011 -0.120888  1.716220
H -1.492228 -6.294990 -0.269070
C -0.523408 -5.804380 -0.379890
O  2.928551 -3.160939 -0.282740
N  7.738640  0.833682  2.162890
H  1.326112 -3.872400 -0.303640
C  5.986651 -0.583278  0.467700
C -0.757598 -4.320010 -0.417080
C  5.084411 -1.382239 -0.450570
N  0.362471 -3.518490 -0.362510
C  2.715901 -1.941579 -0.332700
H  0.322232 -7.426550 -1.549260
C -1.969079 -3.722830 -0.509290
C  0.199212 -6.344030 -1.626990
N  3.681801 -1.006749 -0.359880
C  8.131680  0.387642  0.965560
C  7.303641 -0.312548  0.091850
C  0.254861 -2.163360 -0.401180
H -2.881838 -4.300261 -0.552860
N  1.409411 -1.420069 -0.359500
H  5.435981 -1.268469 -1.485480
C -2.067959 -2.274150 -0.547090
H  1.193192 -5.905360 -1.743400
N -0.895309 -1.533790 -0.478370
H  9.159230  0.607032  0.686570
H  3.437351 -0.009699 -0.484170
H  1.260121 -0.399370 -0.412600
H  7.684101 -0.634228 -0.873010
O -3.161099 -1.696051 -0.635960
H -0.373718 -6.130560 -2.532450

```

The .xyz file for the rectangle shown in Figure 8(a) and used for the calculations of the interatomic distances shown in the histogram of Fig. 7 is given below.

264

Rectangle

```

H 12.576406 -4.562234 -2.486841
H 10.599311  0.242896 -2.394534

```

|    |            |           |           |
|----|------------|-----------|-----------|
| C  | 14.262005  | -2.526610 | -2.203616 |
| H  | 11.295677  | 5.779588  | -2.216673 |
| C  | 12.493951  | -4.828282 | -1.442000 |
| H  | 10.908782  | -6.239503 | -1.821777 |
| H  | 13.292873  | 4.547408  | -1.446398 |
| C  | 10.699991  | 0.208674  | -1.318121 |
| O  | 10.814603  | -2.139922 | -1.238102 |
| C  | 14.471997  | -3.255389 | -0.872003 |
| C  | 11.517820  | 5.750265  | -1.158093 |
| O  | 10.736603  | 2.549271  | -1.079670 |
| C  | 15.791463  | -4.055008 | -0.880941 |
| C  | 11.522029  | -5.772638 | -1.062444 |
| C  | 13.338645  | -4.186809 | -0.486150 |
| C  | 12.679794  | 5.048969  | -0.711120 |
| C  | 10.808486  | -1.010420 | -0.654213 |
| H  | 14.545218  | -2.504454 | -0.078171 |
| C  | 10.777780  | 1.381791  | -0.574779 |
| Ru | 11.126673  | -3.828599 | -0.003950 |
| C  | 10.648290  | 6.378070  | -0.250383 |
| C  | 14.794461  | 3.169686  | 0.228324  |
| C  | 11.314912  | -6.095896 | 0.309628  |
| Ru | 10.859150  | 4.168541  | 0.270456  |
| C  | 15.277168  | 5.276999  | 1.554405  |
| C  | 12.986543  | 4.930073  | 0.651444  |
| C  | 13.075325  | -4.471424 | 0.867187  |
| C  | 10.933716  | -1.057914 | 0.853858  |
| C  | 14.216084  | 4.220579  | 1.179726  |
| C  | 10.933656  | 1.332603  | 0.931724  |
| C  | 10.930226  | 6.227048  | 1.142968  |
| C  | 12.081219  | -5.407633 | 1.269223  |
| O  | 11.002674  | -2.226210 | 1.357423  |
| H  | 13.609541  | -3.922115 | 1.632894  |
| O  | 11.025676  | 2.461573  | 1.508330  |
| C  | 10.972731  | 0.112626  | 1.602023  |
| C  | 12.051967  | 5.505867  | 1.575905  |
| H  | 10.242696  | 6.632879  | 1.873663  |
| H  | 13.910501  | 3.713423  | 2.100861  |
| H  | 11.904871  | -5.578182 | 2.322738  |
| H  | 11.071760  | 0.077814  | 2.678645  |
| H  | 12.203542  | 5.353618  | 2.637217  |
| H  | -12.143425 | -4.703146 | 2.610401  |
| H  | -10.520964 | 0.159923  | 2.424889  |

|    |            |           |           |
|----|------------|-----------|-----------|
| H  | -13.839356 | -3.054976 | 2.140052  |
| C  | -12.140127 | -4.981751 | 1.563696  |
| H  | -10.407035 | -6.247164 | 1.785969  |
| H  | -13.173307 | 4.572816  | 1.805435  |
| C  | -10.679049 | 0.137824  | 1.355037  |
| O  | -10.694061 | -2.212415 | 1.239259  |
| C  | -14.254829 | -3.587171 | 1.277570  |
| C  | -11.462384 | 5.777150  | 1.249450  |
| O  | -10.810736 | 2.479409  | 1.157771  |
| C  | -15.356339 | -4.535363 | 1.797665  |
| C  | -11.136280 | -5.847274 | 1.094197  |
| C  | -13.130043 | -4.421441 | 0.699081  |
| C  | -12.655069 | 5.044621  | 0.979691  |
| C  | -10.779519 | -1.073231 | 0.677401  |
| C  | -14.833492 | -2.549787 | 0.310341  |
| C  | -10.832375 | 1.319472  | 0.635589  |
| Ru | -11.012086 | -3.891568 | 0.003662  |
| C  | -10.720590 | 6.356099  | 0.203738  |
| H  | -14.568092 | 3.414221  | 0.234313  |
| C  | -11.049429 | -6.169777 | -0.291059 |
| Ru | -10.977798 | 4.114690  | -0.169727 |
| C  | -15.608656 | 5.173030  | -0.420825 |
| C  | -13.143075 | 4.864248  | -0.326479 |
| C  | -12.984976 | -4.695181 | -0.672854 |
| C  | -11.006997 | -1.104283 | -0.819386 |
| C  | -14.460615 | 4.152743  | -0.566916 |
| C  | -11.044568 | 1.287445  | -0.863543 |
| C  | -11.167127 | 6.126654  | -1.131811 |
| C  | -11.962554 | -5.555332 | -1.168347 |
| O  | -11.098929 | -2.264719 | -1.333737 |
| H  | -13.631052 | -4.203719 | -1.387221 |
| O  | -11.167545 | 2.424669  | -1.420753 |
| C  | -11.104516 | 0.077049  | -1.547384 |
| C  | -12.335339 | 5.386803  | -1.384081 |
| H  | -10.582277 | 6.498781  | -1.962564 |
| C  | -14.545738 | 3.417908  | -1.909350 |
| H  | -11.883421 | -5.726666 | -2.233532 |
| H  | -11.260239 | 0.054262  | -2.617610 |
| H  | -12.605705 | 5.179634  | -2.410302 |
| H  | 6.552574   | 3.154541  | 2.973062  |
| H  | 8.893364   | 3.844747  | 2.595295  |
| H  | 3.193021   | 5.048729  | -6.513590 |

|   |           |          |           |
|---|-----------|----------|-----------|
| H | 3.363394  | 5.228326 | -4.766827 |
| C | 6.914450  | 3.281436 | 1.960139  |
| C | 8.226646  | 3.677964 | 1.760365  |
| H | 4.591237  | 2.134139 | 2.100475  |
| H | 2.041588  | 6.039716 | -5.612246 |
| C | 2.638482  | 5.126857 | -5.577474 |
| N | 8.751921  | 3.827996 | 0.533245  |
| C | 6.093232  | 3.017120 | 0.866460  |
| C | 4.714410  | 2.410711 | 1.052994  |
| H | 4.673797  | 1.493212 | 0.458824  |
| O | 3.686531  | 2.866757 | -1.534549 |
| H | 2.613147  | 3.477541 | -2.913265 |
| C | 1.741377  | 3.890665 | -5.391984 |
| H | 2.356576  | 2.983901 | -5.395059 |
| C | 7.950170  | 3.626623 | -0.530057 |
| C | 6.631908  | 3.231402 | -0.403438 |
| N | 3.575751  | 3.249116 | 0.711387  |
| C | 3.063147  | 3.246810 | -0.535569 |
| H | 1.050330  | 3.806044 | -6.231215 |
| N | 1.631857  | 3.758587 | -2.947375 |
| H | 2.995048  | 3.570705 | 1.507812  |
| C | 0.936398  | 3.929608 | -4.125796 |
| H | 8.404604  | 3.748716 | -1.503607 |
| H | 6.028701  | 3.058205 | -1.284877 |
| N | 1.746900  | 3.705000 | -0.604485 |
| C | 0.998169  | 3.825104 | -1.750867 |
| C | -0.396627 | 4.141139 | -4.054526 |
| H | 1.208609  | 3.807599 | 0.271035  |
| O | 2.165379  | 3.965947 | 2.985104  |
| H | -0.989526 | 4.283024 | -4.946304 |
| N | -0.292378 | 4.008439 | -1.629009 |
| C | -1.068176 | 4.139962 | -2.771847 |
| C | 0.932315  | 3.860220 | 3.068766  |
| N | 0.161126  | 3.834373 | 1.915516  |
| O | -2.300961 | 4.234055 | -2.672041 |
| H | -1.330943 | 3.805736 | -0.001711 |
| H | 0.845063  | 3.800950 | 5.246436  |
| C | 0.255644  | 3.742972 | 4.343006  |
| C | -1.130180 | 3.640648 | 2.014372  |
| N | -1.873406 | 3.623027 | 0.857987  |
| H | -3.111208 | 3.667150 | -1.266905 |
| H | -2.171254 | 5.488987 | 6.074985  |

|   |           |           |           |
|---|-----------|-----------|-----------|
| C | -1.077755 | 3.527162  | 4.389257  |
| N | -1.768913 | 3.466256  | 3.197219  |
| N | -3.687942 | 3.260346  | -0.507794 |
| C | -3.185534 | 3.162712  | 0.740135  |
| H | -4.644659 | 2.210219  | -1.989122 |
| C | -2.773879 | 4.588099  | 5.950131  |
| H | -3.497087 | 4.773219  | 5.153169  |
| H | -2.750191 | 3.190217  | 3.133953  |
| C | -1.885094 | 3.370714  | 5.644719  |
| H | -6.118039 | 3.151361  | 1.387999  |
| H | -1.195467 | 3.199831  | 6.471871  |
| C | -4.804948 | 2.431957  | -0.933597 |
| O | -3.814849 | 2.702281  | 1.700649  |
| H | -3.329806 | 4.421715  | 6.873730  |
| H | -4.774654 | 1.484870  | -0.386766 |
| C | -6.728451 | 3.276006  | 0.502768  |
| H | -2.505383 | 2.471722  | 5.559102  |
| C | -6.195407 | 3.012187  | -0.760275 |
| H | -8.504304 | 3.803362  | 1.591172  |
| C | -8.054375 | 3.646879  | 0.620358  |
| C | -7.031172 | 3.203318  | -1.858559 |
| H | -6.673475 | 3.036919  | -2.867304 |
| N | -8.868465 | 3.781611  | -0.445085 |
| C | -8.350008 | 3.582340  | -1.668038 |
| H | -9.025767 | 3.698229  | -2.504716 |
| H | 6.569772  | -4.014608 | 2.473717  |
| H | 8.954091  | -3.440047 | 2.135155  |
| H | 3.118042  | -2.734081 | -6.938354 |
| H | 3.398093  | -2.458115 | -5.219114 |
| C | 7.009018  | -4.111584 | 1.485235  |
| C | 8.346233  | -3.791386 | 1.310329  |
| H | 4.764608  | -5.490740 | 1.642074  |
| H | 2.085518  | -1.610851 | -6.046930 |
| C | 2.623316  | -2.558576 | -5.982281 |
| N | 8.970654  | -3.933921 | 0.125313  |
| C | 6.263420  | -4.601051 | 0.411437  |
| C | 4.862418  | -5.158104 | 0.607594  |
| H | 4.758015  | -6.034484 | -0.036167 |
| O | 3.795487  | -4.513956 | -1.904916 |
| H | 2.646201  | -4.007878 | -3.213470 |
| C | 1.659374  | -3.715034 | -5.671357 |
| H | 2.210905  | -4.660926 | -5.647904 |

C 8.237241 -4.324510 -0.936181  
C 6.899731 -4.663769 -0.831732  
N 3.748492 -4.252289 0.358599  
C 3.203075 -4.176817 -0.874265  
H 0.918365 -3.803498 -6.466229  
N 1.673614 -3.689713 -3.220251  
H 3.185021 -3.976283 1.182779  
C 0.929386 -3.547348 -4.371765  
H 8.755122 -4.385230 -1.886103  
H 6.357999 -4.997468 -1.709431  
N 1.892205 -3.686712 -0.885714  
C 1.097620 -3.556033 -2.000877  
C -0.385535 -3.258113 -4.250409  
H 1.378626 -3.608538 0.005948  
O 2.355453 -3.597454 2.681137  
H -1.014760 -3.137545 -5.120171  
N -0.176781 -3.302078 -1.829367  
C -0.992156 -3.155563 -2.941437  
C 1.131853 -3.780368 2.790282  
N 0.313242 -3.671288 1.675454  
O -2.209209 -2.955270 -2.795931  
H -1.249708 -3.543493 -0.175148  
H 1.148667 -4.187250 4.931023  
C 0.518867 -4.118325 4.056135  
C -0.966983 -3.921494 1.797434  
N -1.764342 -3.799453 0.682019  
H -3.073834 -3.567929 -1.372326  
H -1.973242 -2.790878 6.112430  
C -0.803167 -4.391821 4.121601  
N -1.547104 -4.287285 2.965782  
N -3.648426 -4.005356 -0.630337  
C -3.087378 -4.236262 0.576978  
H -4.628319 -4.925642 -2.180717  
C -2.508900 -3.711546 5.873691  
H -3.279313 -3.474772 5.136675  
H -2.526245 -4.575076 2.899341  
C -1.542100 -4.792791 5.363632  
H -5.987169 -4.224766 1.316651  
H -0.807084 -5.027054 6.133996  
C -4.757133 -4.824503 -1.102892  
O -3.681237 -4.783136 1.512960  
H -3.009103 -4.057582 6.778915

|   |            |           |           |
|---|------------|-----------|-----------|
| H | -4.672548  | -5.825150 | -0.667111 |
| C | -6.652996  | -4.141202 | 0.467345  |
| H | -2.093840  | -5.717465 | 5.163061  |
| C | -6.168276  | -4.338629 | -0.827339 |
| H | -8.408402  | -3.767878 | 1.657166  |
| C | -8.001374  | -3.897418 | 0.663216  |
| C | -7.076917  | -4.191077 | -1.874748 |
| H | -6.760522  | -4.295968 | -2.905342 |
| N | -8.884158  | -3.839996 | -0.352537 |
| C | -8.412820  | -3.941997 | -1.606035 |
| H | -9.136459  | -3.838461 | -2.403865 |
| C | 10.296081  | -7.117637 | 0.715111  |
| H | 9.448368   | -7.140910 | 0.029819  |
| H | 9.932153   | -6.945673 | 1.727881  |
| H | 10.762883  | -8.107582 | 0.694218  |
| H | 16.626712  | -3.390181 | -1.106987 |
| H | 15.771055  | -4.837457 | -1.643556 |
| H | 15.988472  | -4.526689 | 0.083537  |
| H | 15.054472  | -1.790180 | -2.344064 |
| H | 13.302930  | -2.006998 | -2.240499 |
| H | 14.315627  | -3.211809 | -3.053447 |
| H | 14.042499  | 2.438311  | -0.076497 |
| H | 15.602250  | 2.632394  | 0.726899  |
| H | 15.221056  | 3.622026  | -0.670289 |
| H | 14.893934  | 6.006870  | 2.270504  |
| H | 15.619820  | 5.818385  | 0.669320  |
| H | 16.141958  | 4.788944  | 2.006295  |
| C | 9.456284   | 7.162284  | -0.711328 |
| H | 8.606926   | 7.038636  | -0.039151 |
| H | 9.154572   | 6.881437  | -1.720053 |
| H | 9.712518   | 8.225930  | -0.725354 |
| C | -9.488203  | 7.167069  | 0.469912  |
| H | -8.732783  | 7.020795  | -0.302206 |
| H | -9.053306  | 6.935784  | 1.441830  |
| H | -9.756604  | 8.227932  | 0.470424  |
| H | -15.541920 | 5.950976  | -1.185248 |
| H | -15.601479 | 5.657132  | 0.557442  |
| H | -16.569226 | 4.669302  | -0.540137 |
| H | -13.707115 | 2.735554  | -2.057848 |
| H | -14.578014 | 4.113923  | -2.751322 |
| H | -15.468692 | 2.837563  | -1.946860 |
| C | -9.999052  | -7.115093 | -0.790781 |

```

H -9.072431 -7.027366 -0.223387
H -9.786647 -6.964639 -1.848635
H -10.362573 -8.140087 -0.668459
H -15.557752 -1.926942 0.836812
H -15.364999 -3.018311 -0.522039
H -14.061328 -1.894761 -0.099934
H -16.146789 -3.957599 2.279023
H -14.970053 -5.248673 2.529145
H -15.804802 -5.101227 0.976972
H -11.116532 5.872087 2.270118

```

The .xyz file for the rectangle shown in Figure 8(b) and used for the calculations of the interatomic distances shown in the histogram of Fig. 7 is given below.

264

Rectangle shrunk

```

H -12.322633 -3.773888 3.100312
H -10.696681 0.904707 2.045572
C -14.298031 -2.192638 2.015487
H -9.062643 6.608566 0.078944
C -12.129729 -4.345297 2.198212
H -10.332838 -5.232996 3.034372
H -11.436885 6.017489 0.402016
C -10.702644 0.643834 0.992749
O -10.698675 -1.684090 1.391953
C -14.333118 -3.465898 1.155686
C -9.643232 6.259551 -0.768954
O -10.626198 2.887678 0.255312
C -15.421548 -4.445244 1.656802
C -10.967849 -5.162668 2.157206
C -13.011409 -4.212076 1.083807
C -11.012554 5.940017 -0.593520
C -10.733819 -0.694380 0.587760
H -14.590314 -3.175821 0.127418
C -10.647383 1.634890 0.010018
Ru -10.847190 -3.598590 0.531041
C -9.008679 6.087061 -2.040037
C -13.757457 4.702122 -0.158363
C -10.620978 -5.872326 0.970017
Ru -9.990111 4.114153 -1.349361
C -14.059165 6.564267 -1.865523
C -11.832819 5.469260 -1.671369

```



|    |            |           |           |
|----|------------|-----------|-----------|
| C  | -12.589396 | -4.847889 | -0.116288 |
| C  | -10.812997 | -1.057714 | -0.885750 |
| C  | -13.327796 | 5.242089  | -1.531695 |
| C  | -10.561917 | 1.262088  | -1.461629 |
| C  | -9.781843  | 5.535598  | -3.091817 |
| C  | -11.426872 | -5.670891 | -0.181952 |
| O  | -10.955665 | -2.303065 | -1.131242 |
| H  | -13.152195 | -4.672976 | -1.029225 |
| O  | -10.363407 | 2.239406  | -2.256605 |
| C  | -10.691567 | -0.070624 | -1.867529 |
| C  | -11.166773 | 5.235088  | -2.899538 |
| H  | -9.316816  | 5.320135  | -4.048434 |
| H  | -13.607102 | 4.501491  | -2.294264 |
| H  | -11.152885 | -6.136329 | -1.123156 |
| H  | -10.683068 | -0.332558 | -2.920124 |
| H  | -11.711330 | 4.762910  | -3.712488 |
| H  | 12.505534  | -4.086862 | -2.727409 |
| H  | 10.147546  | 0.485089  | -2.618902 |
| H  | 14.275473  | -2.690344 | -1.948869 |
| C  | 12.367538  | -4.477609 | -1.722834 |
| H  | 10.625395  | -5.642104 | -2.303382 |
| H  | 11.189059  | 5.690411  | -2.266349 |
| C  | 10.363486  | 0.486566  | -1.555946 |
| O  | 10.654441  | -1.855296 | -1.441071 |
| C  | 14.495258  | -3.237615 | -1.021518 |
| C  | 9.448141   | 6.291487  | -1.127324 |
| O  | 10.105364  | 2.825473  | -1.330663 |
| C  | 15.664645  | -4.207356 | -1.312403 |
| C  | 11.269990  | -5.350708 | -1.480552 |
| C  | 13.257830  | -4.056078 | -0.693234 |
| C  | 10.815889  | 5.914426  | -1.270697 |
| C  | 10.647341  | -0.706139 | -0.884275 |
| C  | 14.879719  | -2.212672 | 0.056174  |
| C  | 10.356171  | 1.679900  | -0.827711 |
| Ru | 11.072488  | -3.500297 | -0.190295 |
| C  | 8.892264   | 6.516925  | 0.161374  |
| H  | 13.261202  | 4.959401  | -1.324658 |
| C  | 11.003737  | -5.826188 | -0.165830 |
| Ru | 9.842235   | 4.404753  | 0.053859  |
| C  | 13.920052  | 6.827497  | -0.477334 |
| C  | 11.690877  | 5.764423  | -0.158829 |
| C  | 12.912480  | -4.465502 | 0.626941  |

|   |           |           |           |
|---|-----------|-----------|-----------|
| C | 10.959067 | -0.704652 | 0.602759  |
| C | 13.169114 | 5.479789  | -0.360806 |
| C | 10.634361 | 1.675193  | 0.667647  |
| C | 9.726494  | 6.283211  | 1.294457  |
| C | 11.819880 | -5.339477 | 0.893595  |
| O | 11.218880 | -1.848348 | 1.108155  |
| H | 13.468251 | -4.068965 | 1.470265  |
| O | 10.562809 | 2.814545  | 1.237574  |
| C | 10.935438 | 0.484939  | 1.335536  |
| C | 11.087763 | 5.906034  | 1.127319  |
| H | 9.315572  | 6.373378  | 2.294770  |
| C | 13.793915 | 4.589941  | 0.724882  |
| H | 11.603156 | -5.624613 | 1.917941  |
| H | 11.141613 | 0.483923  | 2.400417  |
| H | 11.666735 | 5.670790  | 2.014303  |
| H | -5.903866 | 0.950306  | -1.911475 |
| H | -7.713327 | 2.481227  | -2.671862 |
| H | -2.371354 | 5.854668  | 6.312814  |
| H | -2.697440 | 5.386821  | 4.635759  |
| C | -6.425626 | 1.573725  | -1.190937 |
| C | -7.419884 | 2.442903  | -1.628591 |
| H | -5.245992 | -0.463305 | 0.120089  |
| H | -1.155128 | 6.159005  | 5.057200  |
| C | -1.916246 | 5.449831  | 5.403237  |
| N | -8.112952 | 3.229411  | -0.778305 |
| C | -6.135011 | 1.490223  | 0.176850  |
| C | -5.163931 | 0.453606  | 0.712483  |
| H | -5.414914 | 0.213961  | 1.748681  |
| O | -3.787537 | 1.794159  | 2.769037  |
| H | -2.490105 | 2.805406  | 3.694263  |
| C | -1.288024 | 4.070785  | 5.697491  |
| H | -2.061102 | 3.387433  | 6.079905  |
| C | -7.768200 | 3.228002  | 0.526534  |
| C | -6.791601 | 2.380102  | 1.035734  |
| N | -3.777050 | 0.877969  | 0.661591  |
| C | -3.213351 | 1.544470  | 1.696458  |
| H | -0.532815 | 4.167420  | 6.484436  |
| N | -1.485294 | 2.918080  | 3.537323  |
| H | -3.346662 | 0.914015  | -0.281198 |
| C | -0.635189 | 3.459692  | 4.487432  |
| H | -8.337896 | 3.880682  | 1.178250  |
| H | -6.572533 | 2.389139  | 2.099022  |

|   |           |           |           |
|---|-----------|-----------|-----------|
| N | -1.879937 | 1.888550  | 1.456498  |
| C | -0.994396 | 2.394497  | 2.381747  |
| C | 0.701005  | 3.439380  | 4.235136  |
| H | -1.458741 | 1.609215  | 0.554449  |
| O | -2.959909 | 0.963855  | -1.994062 |
| H | 1.412468  | 3.847611  | 4.943385  |
| N | 0.285561  | 2.355224  | 2.088270  |
| C | 1.210751  | 2.849704  | 3.005030  |
| C | -1.742385 | 0.921440  | -2.271988 |
| N | -0.802625 | 1.138698  | -1.270505 |
| O | 2.428339  | 2.766029  | 2.756137  |
| H | 0.972139  | 1.572597  | 0.348521  |
| H | -1.986323 | 0.503276  | -4.405488 |
| C | -1.259356 | 0.652706  | -3.616435 |
| C | 0.478257  | 1.031710  | -1.554685 |
| N | 1.384037  | 1.261140  | -0.545529 |
| H | 2.898093  | 1.723233  | 1.357180  |
| H | 0.700890  | 2.353547  | -5.917258 |
| C | 0.073849  | 0.549850  | -3.856948 |
| N | 0.944150  | 0.729980  | -2.795664 |
| N | 3.363996  | 1.183702  | 0.607093  |
| C | 2.743325  | 0.922463  | -0.559697 |
| H | 4.663501  | 0.302285  | 1.943255  |
| C | 1.404383  | 1.524193  | -5.790430 |
| H | 2.225590  | 1.871041  | -5.152505 |
| H | 1.953999  | 0.578706  | -2.869358 |
| C | 0.698696  | 0.288984  | -5.199898 |
| H | 5.575078  | 1.847147  | -1.417962 |
| H | -0.088503 | -0.049937 | -5.880595 |
| C | 4.681861  | 0.664746  | 0.910774  |
| O | 3.295638  | 0.409016  | -1.553506 |
| H | 1.823800  | 1.282751  | -6.772134 |
| H | 4.873669  | -0.191437 | 0.256122  |
| C | 6.131875  | 2.164429  | -0.540886 |
| H | 1.415906  | -0.538828 | -5.108864 |
| C | 5.791321  | 1.683350  | 0.731309  |
| H | 7.536728  | 3.367031  | -1.658096 |
| C | 7.216135  | 3.020666  | -0.682040 |
| C | 6.533808  | 2.151341  | 1.820008  |
| H | 6.296263  | 1.838636  | 2.832491  |
| N | 7.963308  | 3.419279  | 0.371333  |
| C | 7.607741  | 3.010124  | 1.605073  |

|   |           |           |           |
|---|-----------|-----------|-----------|
| H | 8.228325  | 3.351869  | 2.426044  |
| H | -6.550438 | -4.162308 | -2.294804 |
| H | -8.974980 | -3.840495 | -1.850805 |
| H | -2.740390 | -0.323209 | 6.700762  |
| H | -2.968668 | -0.175450 | 4.947418  |
| C | -6.882829 | -3.907859 | -1.292044 |
| C | -8.245593 | -3.739941 | -1.054456 |
| H | -4.373725 | -4.558745 | -1.460514 |
| H | -1.596518 | 0.630109  | 5.734359  |
| C | -2.215062 | -0.275304 | 5.739621  |
| N | -8.732618 | -3.463027 | 0.171410  |
| C | -5.966489 | -3.784434 | -0.240812 |
| C | -4.500750 | -4.153343 | -0.448009 |
| H | -4.261050 | -4.961408 | 0.261290  |
| O | -3.478443 | -3.082844 | 1.975592  |
| H | -2.359772 | -2.217684 | 3.214987  |
| C | -1.338781 | -1.531134 | 5.559782  |
| H | -1.964779 | -2.429238 | 5.660382  |
| C | -7.855330 | -3.276476 | 1.181405  |
| C | -6.481295 | -3.427165 | 1.016128  |
| N | -3.506188 | -3.082824 | -0.316480 |
| C | -2.926904 | -2.841497 | 0.889519  |
| H | -0.594497 | -1.581068 | 6.360812  |
| N | -1.388858 | -1.900513 | 3.129455  |
| H | -2.977638 | -2.864850 | -1.179803 |
| C | -0.617111 | -1.587465 | 4.236834  |
| H | -8.282555 | -3.021074 | 2.145621  |
| H | -5.814008 | -3.302070 | 1.863430  |
| N | -1.639480 | -2.298663 | 0.813285  |
| C | -0.829020 | -2.005563 | 1.891735  |
| C | 0.712313  | -1.362322 | 4.043000  |
| H | -1.129480 | -2.363005 | -0.082804 |
| O | -2.164155 | -2.813415 | -2.640416 |
| H | 1.366442  | -1.119954 | 4.873328  |
| N | 0.453692  | -1.833107 | 1.659247  |
| C | 1.301227  | -1.537460 | 2.721126  |
| C | -0.941421 | -3.040856 | -2.762992 |
| N | -0.097589 | -2.779585 | -1.687166 |
| O | 2.531224  | -1.528792 | 2.518776  |
| H | 1.466614  | -2.427326 | 0.115612  |
| H | -1.007486 | -3.822896 | -4.811256 |
| C | -0.362060 | -3.640937 | -3.959212 |

|   |            |           |           |
|---|------------|-----------|-----------|
| C | 1.159221   | -3.161291 | -1.751731 |
| N | 1.958386   | -2.905535 | -0.656128 |
| H | 3.311330   | -2.400586 | 1.356367  |
| H | 1.918531   | -2.973302 | -6.413222 |
| C | 0.941764   | -4.034529 | -3.967492 |
| N | 1.701803   | -3.779558 | -2.837941 |
| N | 3.801059   | -3.070122 | 0.743460  |
| C | 3.216893   | -3.466359 | -0.416839 |
| H | 4.710751   | -3.773829 | 2.456969  |
| C | 2.529553   | -3.758974 | -5.946586 |
| H | 3.305295   | -3.274769 | -5.336786 |
| H | 2.645960   | -4.160554 | -2.716237 |
| C | 1.649055   | -4.717089 | -5.110887 |
| H | 5.960116   | -3.509551 | -1.154917 |
| H | 0.895414   | -5.184996 | -5.755014 |
| C | 4.822767   | -3.902680 | 1.373699  |
| O | 3.748616   | -4.263996 | -1.204544 |
| H | 3.033062   | -4.315500 | -6.744917 |
| H | 4.614100   | -4.960442 | 1.150032  |
| C | 6.683090   | -3.493995 | -0.347058 |
| H | 2.273233   | -5.533977 | -4.714083 |
| C | 6.268199   | -3.635764 | 0.985024  |
| H | 8.390904   | -3.283933 | -1.658308 |
| C | 8.039294   | -3.384724 | -0.637233 |
| C | 7.263541   | -3.613352 | 1.970336  |
| H | 7.010574   | -3.697760 | 3.023599  |
| N | 8.991487   | -3.411058 | 0.319712  |
| C | 8.602116   | -3.497486 | 1.606979  |
| H | 9.389237   | -3.472372 | 2.353042  |
| C | -9.414850  | -6.768554 | 0.929715  |
| H | -8.634348  | -6.434872 | 1.620245  |
| H | -8.991944  | -6.841532 | -0.076716 |
| H | -9.716884  | -7.780445 | 1.236313  |
| H | -16.398935 | -3.950869 | 1.652849  |
| H | -15.214387 | -4.771906 | 2.684600  |
| H | -15.493784 | -5.337595 | 1.024646  |
| H | -15.256881 | -1.671610 | 1.931426  |
| H | -13.508171 | -1.503733 | 1.698390  |
| H | -14.151366 | -2.415700 | 3.079130  |
| H | -13.198773 | 3.803483  | 0.123655  |
| H | -14.821869 | 4.448338  | -0.184261 |
| H | -13.630061 | 5.448619  | 0.635200  |

```

H -13.805865  6.931779 -2.866525
H -13.807049  7.349033 -1.139855
H -15.142775  6.409461 -1.828002
C -7.560120  6.442255 -2.236111
H -7.099620  5.850725 -3.033346
H -6.978778  6.308621 -1.318456
H -7.490346  7.502098 -2.522976
C  7.459828  6.945472  0.328564
H  7.025781  6.569584  1.260230
H  6.834680  6.618431 -0.508350
H  7.422523  8.044893  0.364201
H 13.853785  7.397169  0.459031
H 13.519717  7.452078 -1.284281
H 14.980002  6.647309 -0.686056
H 13.237953  3.655979  0.862400
H 13.851144  5.101135  1.693847
H 14.820282  4.335899  0.441074
C  9.868481 -6.775574  0.099888
H  9.051017 -6.645877 -0.616289
H  9.472215 -6.667011  1.113996
H 10.239124 -7.806229 -0.002338
H 15.711949 -1.599536 -0.304122
H 15.218817 -2.693524  0.981449
H 14.048470 -1.543555  0.302930
H 16.551014 -3.642343 -1.621110
H 15.420997 -4.913828 -2.113850
H 15.929327 -4.786097 -0.417901
H  8.823804  6.389437 -2.009646

```

The .xyz file for the rectangle shown in Figure 8(c) and used for the calculations of the interatomic distances shown in the histogram of Fig. 7 is given below.

268

Shrunk rectangle with counterions

```

H -12.695085 -2.092225  2.191603
H -9.651601  1.819436  1.524797
C -13.929269 -0.190395  0.620056
H -6.297168  6.832630 -0.149268
C -12.476528 -2.773343  1.380828
H -11.348659 -4.096797  2.656987
H -8.749952  6.897929 -0.319301
C -9.536201  1.510441  0.494335

```

O -10.127746 -0.723031 0.942069  
C -14.084861 -1.495973 -0.165803  
C -6.772289 6.577888 -1.087049  
O -8.853917 3.643991 -0.239911  
C -15.445912 -2.163036 0.125290  
C -11.671554 -3.899274 1.644334  
C -13.004994 -2.521862 0.095862  
C -8.169837 6.643284 -1.195512  
C -9.800292 0.192925 0.122996  
H -14.046323 -1.256555 -1.233793  
C -9.102425 2.417793 -0.469454  
Ru -10.693160 -2.586579 0.081891  
C -5.970588 6.317417 -2.226032  
C -11.200147 6.331040 -1.476556  
C -11.429167 -4.854766 0.633828  
Ru -7.603040 4.582540 -1.712350  
C -10.390653 8.229354 -2.960780  
C -8.829373 6.398731 -2.429143  
C -12.504655 -3.332072 -0.946268  
C -9.702937 -0.225533 -1.328890  
C -10.288763 6.721997 -2.644496  
C -8.855208 1.953689 -1.891063  
C -6.625679 5.790645 -3.352262  
C -11.696005 -4.459402 -0.693341  
O -10.065826 -1.417833 -1.587117  
H -12.754356 -3.084413 -1.970476  
O -8.318578 2.810446 -2.661420  
C -9.204317 0.661150 -2.279826  
C -8.033944 5.879480 -3.464463  
H -6.044326 5.436195 -4.191986  
H -10.611546 6.165820 -3.530589  
H -11.391532 -5.093904 -1.514082  
H -9.068374 0.343678 -3.305327  
H -8.510359 5.536899 -4.374199  
H 11.568403 -2.425922 -3.720754  
H 8.316690 1.239519 -2.642232  
H 13.267187 -0.981354 -2.966517  
C 11.657270 -3.016054 -2.817431  
H 10.168201 -4.445746 -3.461865  
H 8.545505 6.672133 -1.628056  
C 8.736514 1.191749 -1.646090  
O 9.360874 -1.066458 -1.860423

C 13.645653 -1.587492 -2.136534  
C 6.809105 6.602182 -0.346631  
O 8.202047 3.430129 -1.140183  
C 14.918221 -2.315580 -2.618440  
C 10.827652 -4.150233 -2.657867  
C 12.595862 -2.635309 -1.841842  
C 8.201165 6.628728 -0.602450  
C 9.314086 0.010618 -1.185226  
C 13.955576 -0.649742 -0.965242  
C 8.695290 2.305921 -0.810646  
Ru 10.449752 -2.670967 -0.986134  
C 6.331182 6.640830 0.975167  
H 10.779994 6.697335 -0.893442  
C 10.992818 -4.993263 -1.544757  
Ru 7.791625 4.752625 0.501186  
C 10.861687 8.382672 0.441365  
C 9.148345 6.608643 0.437956  
C 12.518451 -3.323325 -0.603933  
C 9.923862 -0.053402 0.199373  
C 10.609300 6.884534 0.171843  
C 9.232700 2.215492 0.604185  
C 7.262022 6.331503 1.997900  
C 11.709497 -4.461888 -0.445163  
O 10.473138 -1.157673 0.513309  
H 13.100664 -2.976715 0.238700  
O 9.079388 3.256313 1.317511  
C 9.839579 1.043848 1.052961  
C 8.642237 6.353293 1.738023  
H 6.912424 6.187020 3.010920  
C 11.571893 6.001056 0.971650  
H 11.727796 -5.001554 0.491876  
H 10.237138 0.985397 2.057578  
H 9.328085 6.165480 2.552224  
H -5.129970 0.109375 -1.122269  
H -5.847514 2.107974 -2.401047  
H -1.238247 5.184175 6.201424  
H -1.723320 4.462440 4.666815  
C -5.432116 1.007137 -0.600331  
C -5.804171 2.125202 -1.321186  
H -5.565280 -1.062775 1.156873  
H -0.073349 5.058259 4.878514  
C -0.900588 4.552141 5.378783



|   |           |           |           |
|---|-----------|-----------|-----------|
| N | -6.208967 | 3.260633  | -0.728536 |
| C | -5.466812 | 1.050302  | 0.791601  |
| C | -5.123790 | -0.173822 | 1.606031  |
| H | -5.497220 | -0.080214 | 2.623873  |
| O | -3.411140 | 0.994425  | 3.458505  |
| H | -1.941787 | 1.786007  | 4.182280  |
| C | -0.458689 | 3.180232  | 5.914879  |
| H | -1.291705 | 2.705915  | 6.444317  |
| C | -6.139126 | 3.338853  | 0.610730  |
| C | -5.775047 | 2.263371  | 1.398618  |
| N | -3.679847 | -0.370937 | 1.648061  |
| C | -2.942814 | 0.367686  | 2.502254  |
| H | 0.345901  | 3.308735  | 6.640212  |
| N | -0.934143 | 1.690709  | 4.026247  |
| H | -3.270662 | -0.670442 | 0.750011  |
| C | 0.027760  | 2.259136  | 4.834211  |
| H | -6.452284 | 4.273964  | 1.052024  |
| H | -5.767212 | 2.363270  | 2.476032  |
| N | -1.576908 | 0.327754  | 2.230104  |
| C | -0.581359 | 0.883014  | 2.996126  |
| C | 1.323246  | 1.975450  | 4.579651  |
| H | -1.268647 | -0.147794 | 1.371549  |
| O | -3.053523 | -1.023520 | -1.053919 |
| H | 2.116743  | 2.389885  | 5.184875  |
| N | 0.654521  | 0.594496  | 2.689400  |
| C | 1.681537  | 1.094001  | 3.483489  |
| C | -1.878364 | -1.022902 | -1.445826 |
| N | -0.857096 | -0.813830 | -0.531544 |
| O | 2.850410  | 0.783374  | 3.238204  |
| H | 1.052097  | -0.442024 | 0.928569  |
| H | -2.306153 | -1.346553 | -3.558700 |
| C | -1.515686 | -1.227517 | -2.831993 |
| C | 0.382573  | -0.927359 | -0.930362 |
| N | 1.368490  | -0.746256 | 0.000354  |
| H | 2.978035  | -0.440780 | 1.800299  |
| H | 1.708617  | -0.070240 | -4.860395 |
| C | -0.217213 | -1.343799 | -3.188282 |
| N | 0.740041  | -1.209290 | -2.207574 |
| N | 3.418811  | -0.868758 | 0.975940  |
| C | 2.730911  | -0.988776 | -0.170537 |
| H | 5.230061  | -1.299983 | 1.886877  |
| C | 1.631788  | -1.153120 | -4.977255 |

H 2.430911 -1.616429 -4.392887  
H 1.746276 -1.298762 -2.368052  
C 0.245502 -1.673088 -4.584565  
H 4.651909 1.039764 -1.025220  
H -0.508380 -1.290412 -5.275241  
C 4.866348 -0.790781 0.994410  
O 3.216647 -1.300425 -1.265066  
H 1.827372 -1.388332 -6.024455  
H 5.250461 -1.312195 0.120099  
C 5.132435 1.438816 -0.141023  
H 0.223830 -2.763670 -4.689784  
C 5.317638 0.647564 0.990842  
H 5.563443 3.344059 -1.036980  
C 5.626735 2.725899 -0.152914  
C 5.891907 1.235395 2.109411  
H 5.991489 0.687791 3.037095  
N 6.295705 3.246874 0.891123  
C 6.369756 2.529969 2.022622  
H 6.884271 2.993856 2.852125  
H -6.353365 -4.622633 -1.843671  
H -8.592838 -3.561301 -1.864901  
H -2.637827 -0.863133 7.257864  
H -2.748259 -0.765617 5.499427  
C -6.771308 -4.231706 -0.923947  
C -8.027433 -3.647595 -0.947397  
H -4.646558 -5.688918 -0.544856  
H -1.275358 -0.240391 6.322469  
C -2.074987 -0.983000 6.330308  
N -8.619786 -3.170671 0.158525  
C -6.074025 -4.331447 0.276524  
C -4.761726 -5.086266 0.356506  
H -4.803325 -5.764228 1.211779  
O -3.648736 -4.047251 2.727619  
H -2.490507 -3.216739 3.912764  
C -1.492137 -2.403780 6.249584  
H -2.300253 -3.136153 6.343086  
C -7.930860 -3.210774 1.312391  
C -6.671358 -3.778653 1.410157  
N -3.554139 -4.277376 0.463900  
C -3.027794 -3.973190 1.662314  
H -0.816661 -2.570571 7.089794  
N -1.487885 -3.011563 3.873259

H -2.994566 -4.186239 -0.396037  
C -0.735557 -2.674730 4.978411  
H -8.426477 -2.787101 2.175584  
H -6.162256 -3.807835 2.365458  
N -1.682911 -3.578382 1.604666  
C -0.891249 -3.272724 2.682252  
C 0.607677 -2.599905 4.839739  
H -1.165632 -3.758193 0.734858  
O -2.253297 -4.549606 -1.950490  
H 1.242900 -2.342402 5.675168  
N 0.405793 -3.234466 2.500155  
C 1.234190 -2.923496 3.570336  
C -1.034390 -4.768975 -2.001754  
N -0.231489 -4.462806 -0.909333  
O 2.466001 -2.986861 3.431643  
H 1.329668 -3.984241 0.911457  
H -1.015217 -5.588329 -4.026434  
C -0.403543 -5.375379 -3.161311  
C 1.034438 -4.796441 -0.935918  
N 1.813474 -4.486066 0.152181  
H 3.231919 -3.721669 2.048536  
H 2.053573 -4.522964 -5.423949  
C 0.908460 -5.700331 -3.132031  
N 1.623204 -5.413214 -1.991947  
N 3.749937 -4.342038 1.405481  
C 3.145989 -4.878193 0.332385  
H 5.108265 -4.649896 2.917180  
C 2.616895 -5.342502 -4.974160  
H 3.350494 -4.913116 -4.288998  
H 2.593946 -5.708253 -1.834482  
C 1.677073 -6.328923 -4.259633  
H 5.431958 -4.037200 -0.813122  
H 0.963490 -6.744469 -4.972110  
C 5.049082 -4.830623 1.843509  
O 3.715108 -5.653524 -0.445638  
H 3.162799 -5.851853 -5.769657  
H 5.088334 -5.913973 1.691097  
C 6.301011 -3.901237 -0.187434  
H 2.259707 -7.168791 -3.867356  
C 6.264567 -4.221721 1.168715  
H 7.521506 -3.159068 -1.798118  
C 7.470688 -3.420136 -0.749785

|   |            |           |           |
|---|------------|-----------|-----------|
| C | 7.432289   | -4.011348 | 1.899258  |
| H | 7.470425   | -4.220032 | 2.961899  |
| N | 8.600201   | -3.249277 | -0.043373 |
| C | 8.566929   | -3.525877 | 1.269756  |
| H | 9.479380   | -3.340349 | 1.819184  |
| C | -10.748261 | -6.149498 | 0.939009  |
| H | -10.113220 | -6.084494 | 1.823476  |
| H | -10.164795 | -6.519578 | 0.095293  |
| H | -11.551459 | -6.864478 | 1.142781  |
| H | -16.258014 | -1.486852 | -0.153509 |
| H | -15.538327 | -2.402367 | 1.186909  |
| H | -15.556637 | -3.107569 | -0.407678 |
| H | -14.702877 | 0.516183  | 0.313068  |
| H | -12.956777 | 0.276351  | 0.453521  |
| H | -14.051588 | -0.350365 | 1.694269  |
| H | -11.091542 | 5.277885  | -1.211129 |
| H | -12.242322 | 6.513870  | -1.745485 |
| H | -10.990471 | 6.929229  | -0.586147 |
| H | -9.703664  | 8.522704  | -3.755134 |
| H | -10.118402 | 8.825472  | -2.086537 |
| H | -11.414608 | 8.481285  | -3.247110 |
| C | -4.480421  | 6.423115  | -2.166456 |
| H | -3.989697  | 5.705073  | -2.824419 |
| H | -4.097392  | 6.308726  | -1.151706 |
| H | -4.241000  | 7.432874  | -2.513690 |
| C | 4.876403   | 6.806809  | 1.276729  |
| H | 4.576325   | 6.265011  | 2.174580  |
| H | 4.244053   | 6.505303  | 0.441018  |
| H | 4.730166   | 7.876873  | 1.452801  |
| H | 10.727541  | 8.611825  | 1.500814  |
| H | 10.155343  | 9.014182  | -0.097911 |
| H | 11.882502  | 8.645786  | 0.153774  |
| H | 11.359553  | 4.939781  | 0.830813  |
| H | 11.521870  | 6.219399  | 2.041468  |
| H | 12.598620  | 6.193327  | 0.654430  |
| C | 10.290825  | -6.308722 | -1.450245 |
| H | 9.395689   | -6.345650 | -2.072104 |
| H | 10.034120  | -6.570174 | -0.422930 |
| H | 11.003098  | -7.049468 | -1.827323 |
| H | 14.655286  | 0.122676  | -1.290177 |
| H | 14.431526  | -1.183764 | -0.138881 |
| H | 13.059017  | -0.159107 | -0.582196 |

|    |            |           |           |
|----|------------|-----------|-----------|
| H  | 15.664739  | -1.584042 | -2.937829 |
| H  | 14.705928  | -3.004199 | -3.436282 |
| H  | 15.343987  | -2.920884 | -1.815135 |
| H  | 6.113036   | 6.681485  | -1.170196 |
| Cl | 7.290407   | 9.378832  | 1.174854  |
| Cl | 13.552278  | -5.785273 | -2.727038 |
| Cl | -14.238643 | -5.618345 | 0.876579  |
| Cl | -6.685462  | 8.968076  | -3.182164 |
